# Supplementary material for: Mitochondrial function in skeletal myofibers is controlled by a TRF2‐SIRT3 axis over lifetime
Source: PubMed Central journal article supplement (PMC7059141; doi:10.1111/acel.13097), 2020-01-28

Figure S1

**a**

| PATIENT | SEX | AGE (At Biopsy) |          | LOCALIZATION |
|---------|-----|-----------------|----------|--------------|
| 1       | ♂   | 14w             | Fetus    | QUADRICEPS   |
| 2       | ♂   | 22w             | Fetus    | QUADRICEPS   |
| 3       | ♂   | 22w             | Fetus    | QUADRICEPS   |
| 4       | ♂   | 37w             | Fetus    | QUADRICEPS   |
| 5       | ♂   | 37w             | Fetus    | QUADRICEPS   |
| 6       | ♂   | 17              | Teenager | LEFT DELTOID |
| 7       | ♂   | 17              | Teenager | QUADRICEPS   |
| 8       | ♂   | 18              | Teenager | LEFT DELTOID |
| 9       | ♂   | 18              | Teenager | QUADRICEPS   |
| 10      | ♂   | 19              | Teenager | LEFT DELTOID |
| 11      | ♂   | 24              | Adult    | LEFT DELTOID |
| 12      | ♂   | 27              | Adult    | LEFT DELTOID |
| 13      | ♂   | 35              | Adult    | QUADRICEPS   |
| 14      | ♂   | 60              | Elder    | RIGHT BICEPS |
| 15      | ♂   | 65              | Elder    | LEFT DELTOID |
| 16      | ♂   | 68              | Elder    | QUADRICEPS   |
| 17      | ♂   | 69              | Elder    | LEFT BICEPS  |
| 18      | ♂   | 71              | Elder    | QUADRICEPS   |
| 19      | ♂   | 71              | Elder    | QUADRICEPS   |
| 20      | ♂   | 72              | Elder    | QUADRICEPS   |

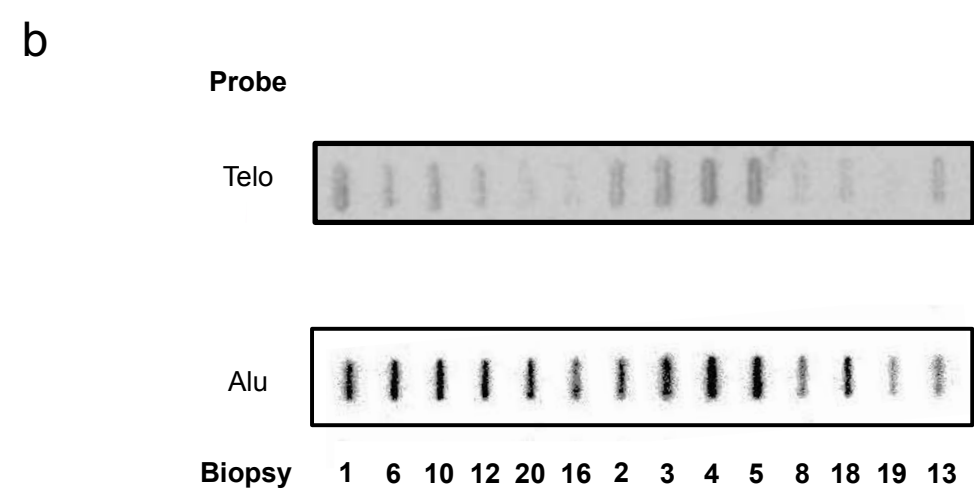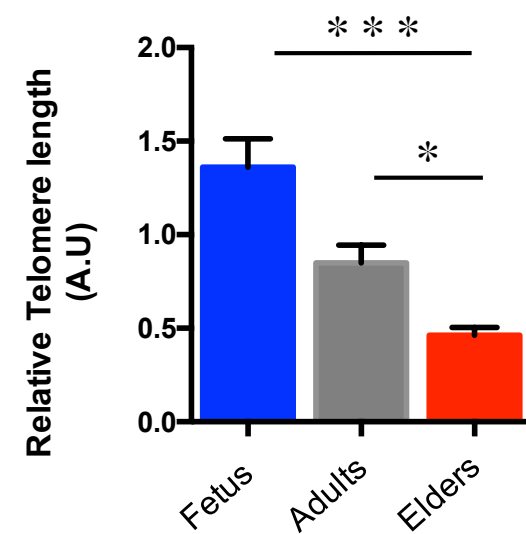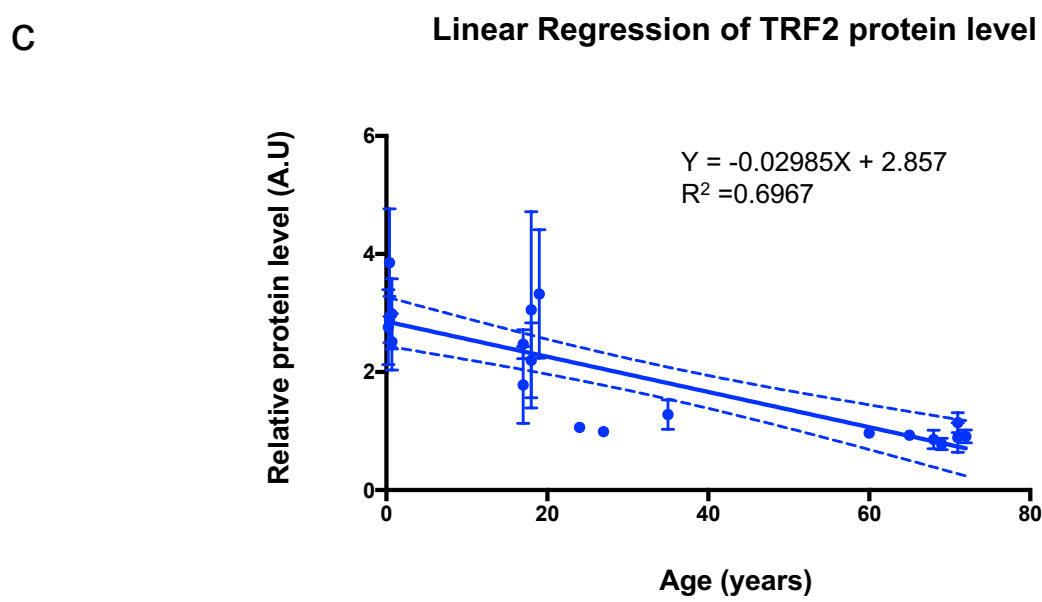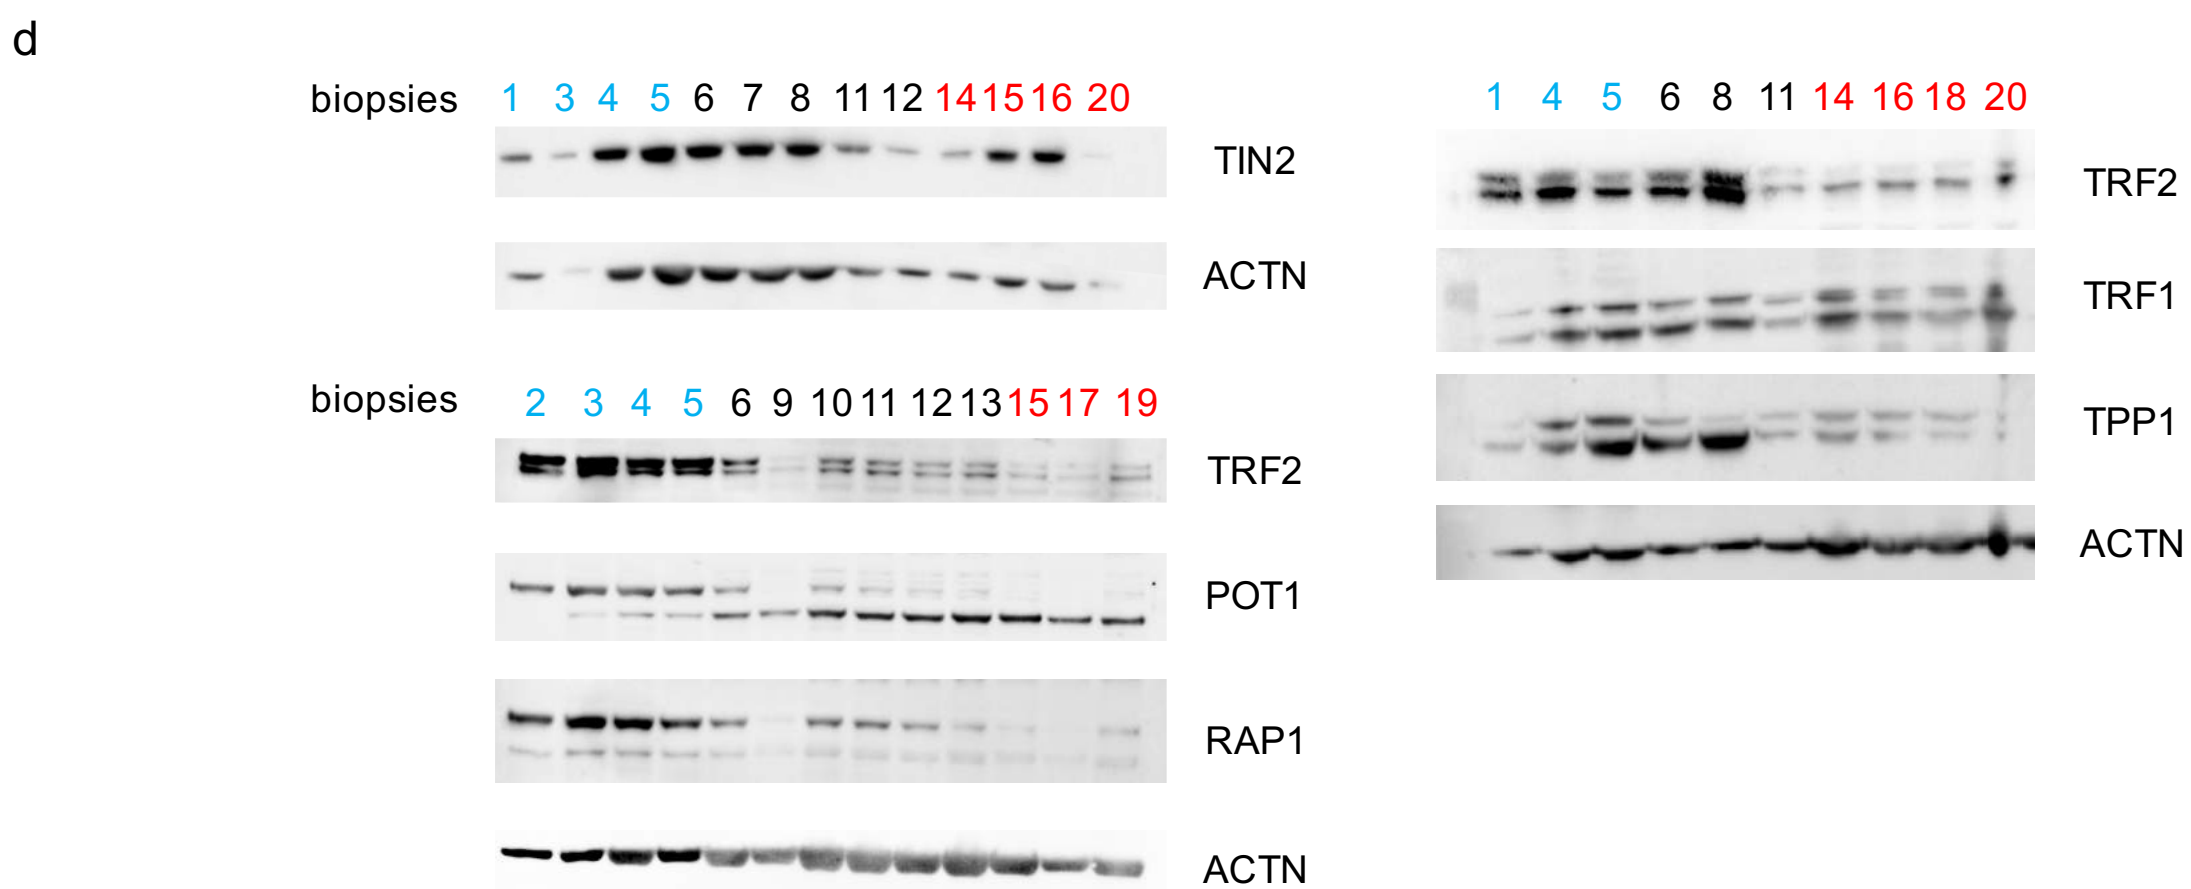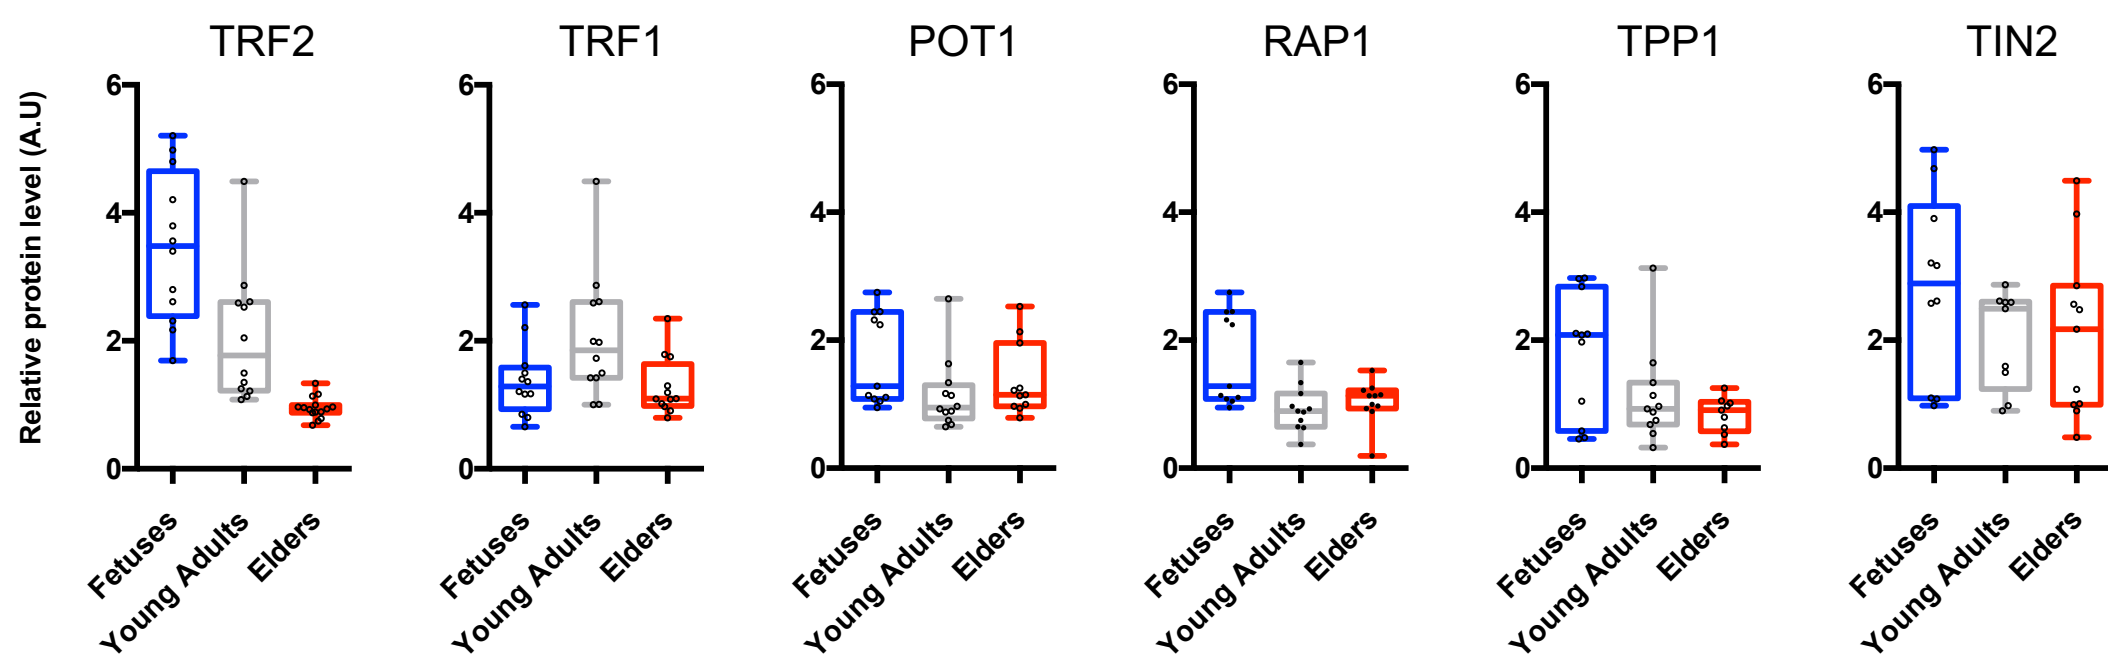

Figure S2

a

MYOBLASTS

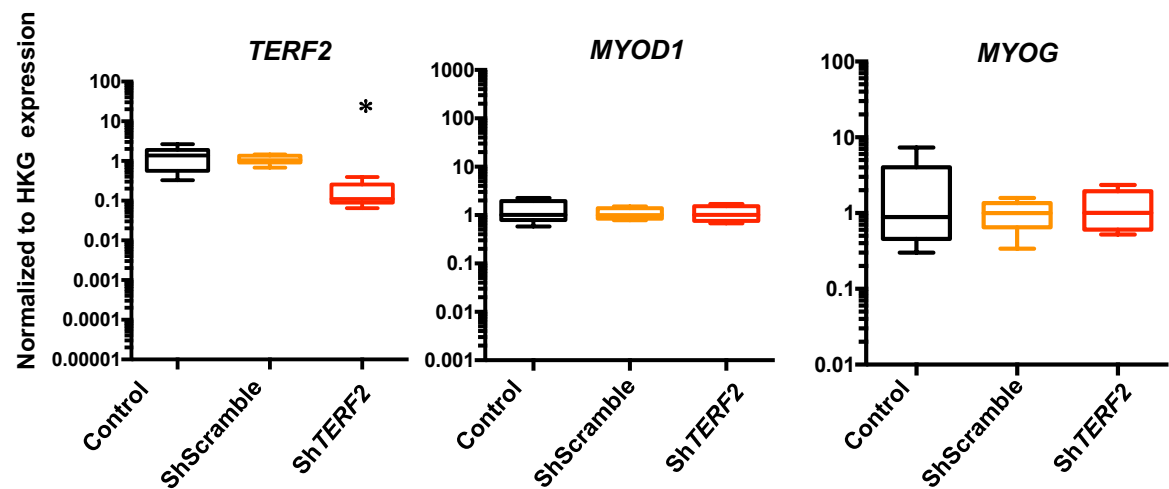

MYOTUBES

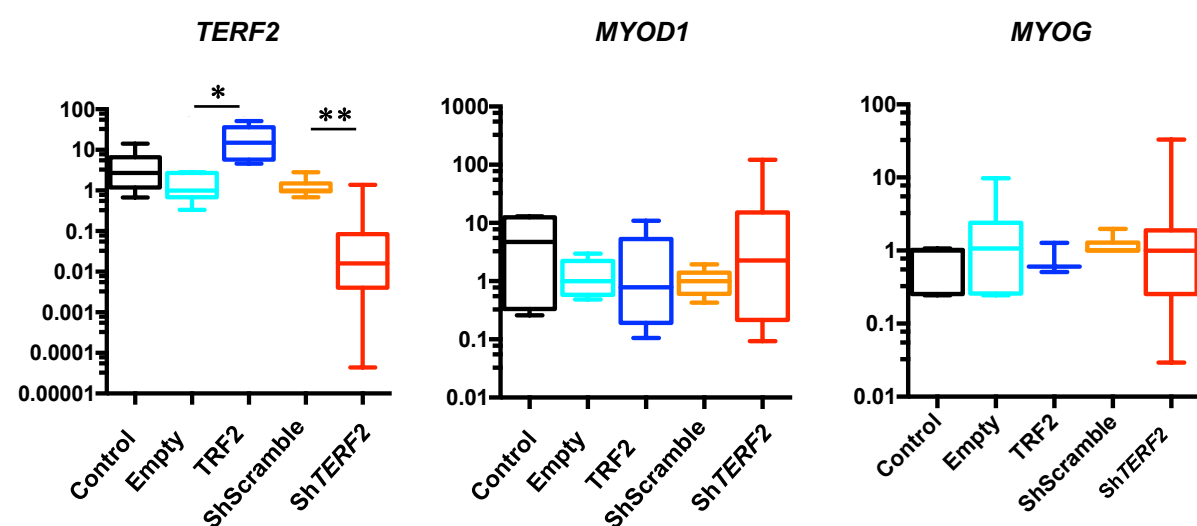

b

Fusion Index

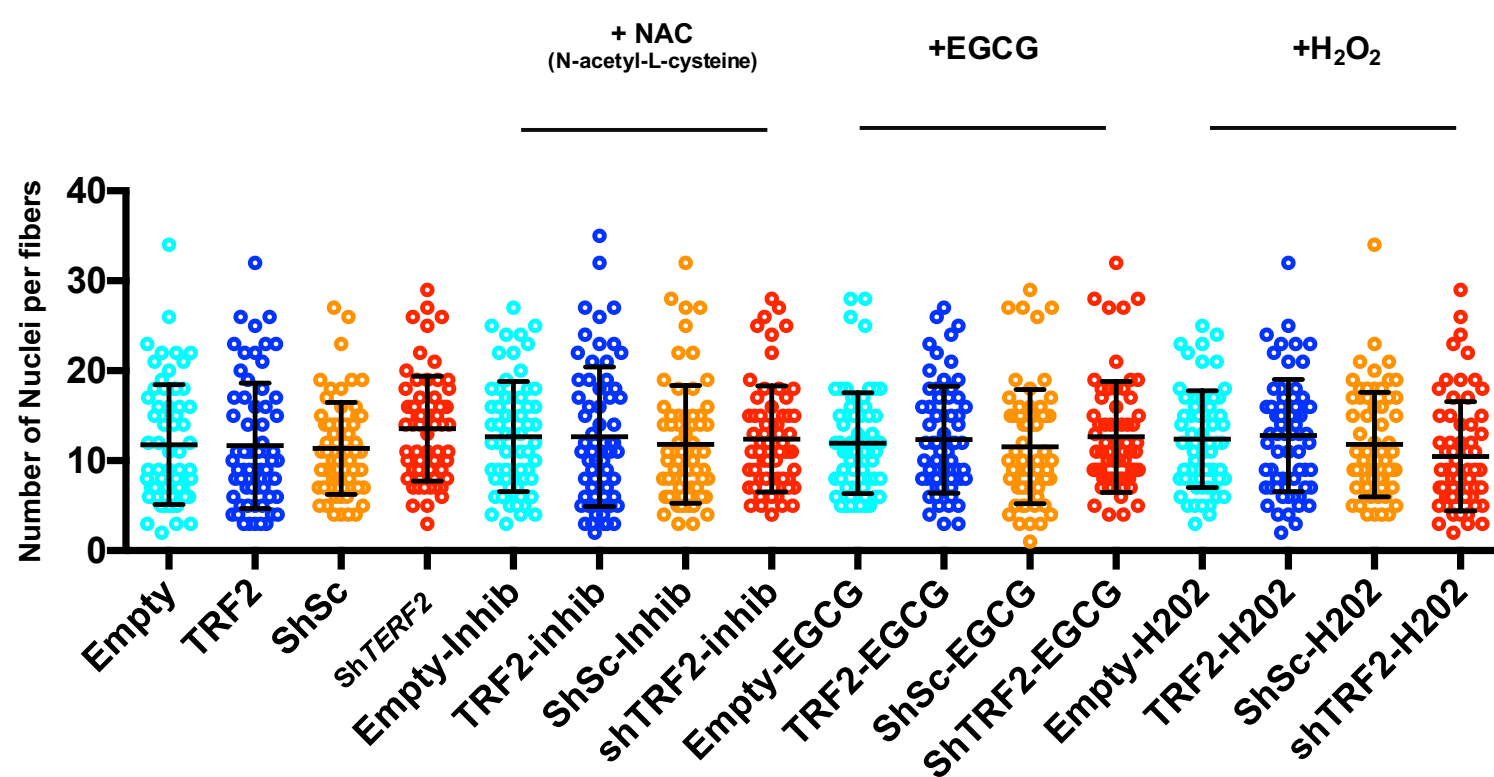

c

MYOTUBES

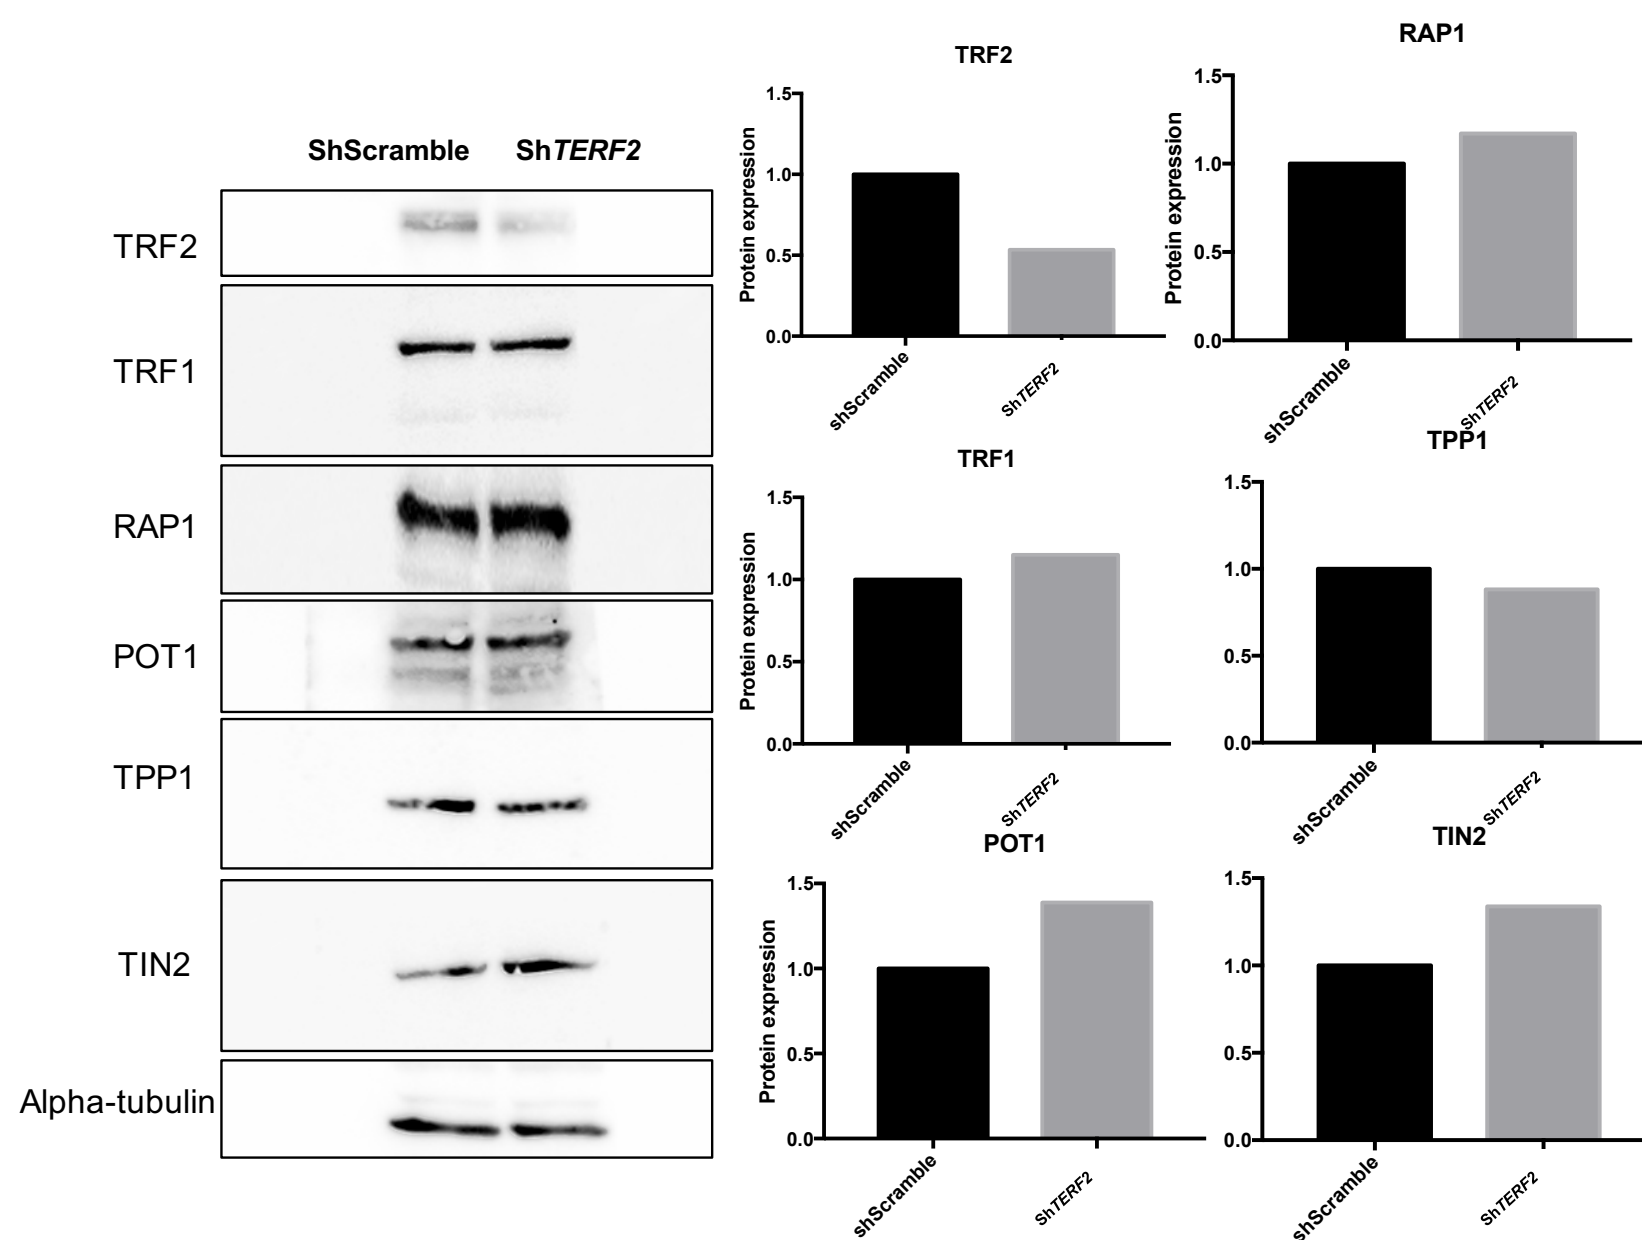

Figure S3

a

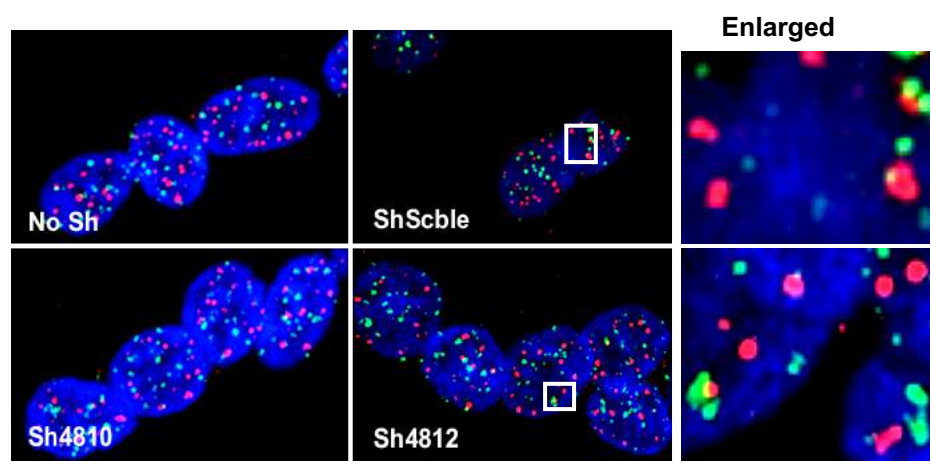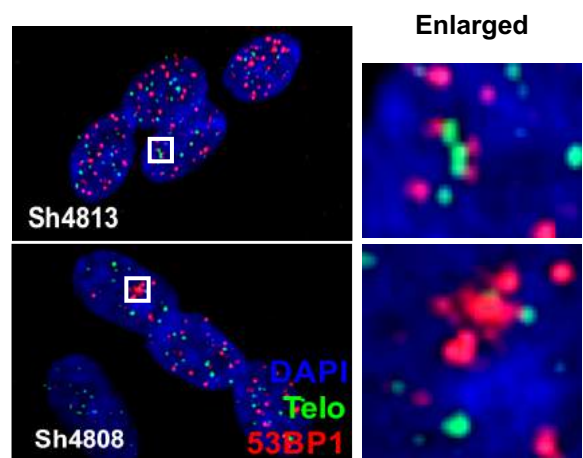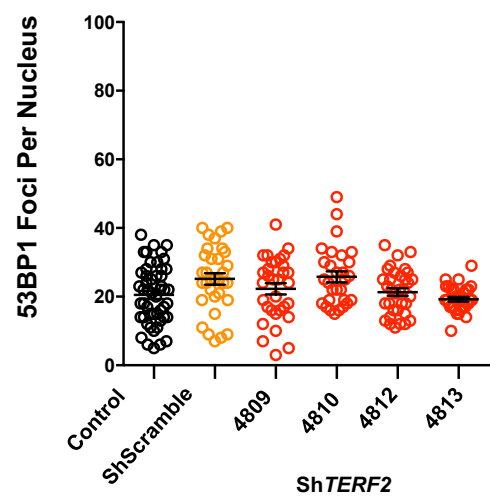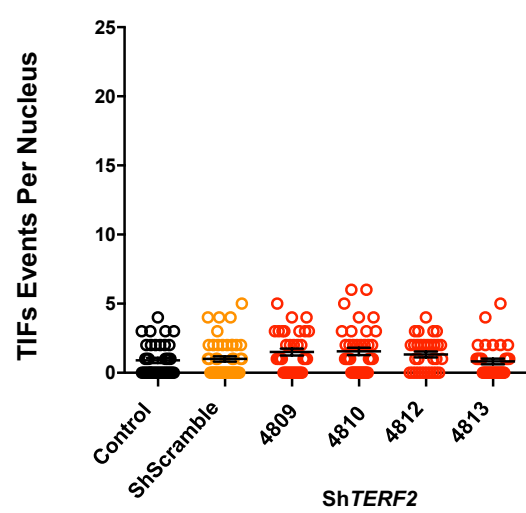

b

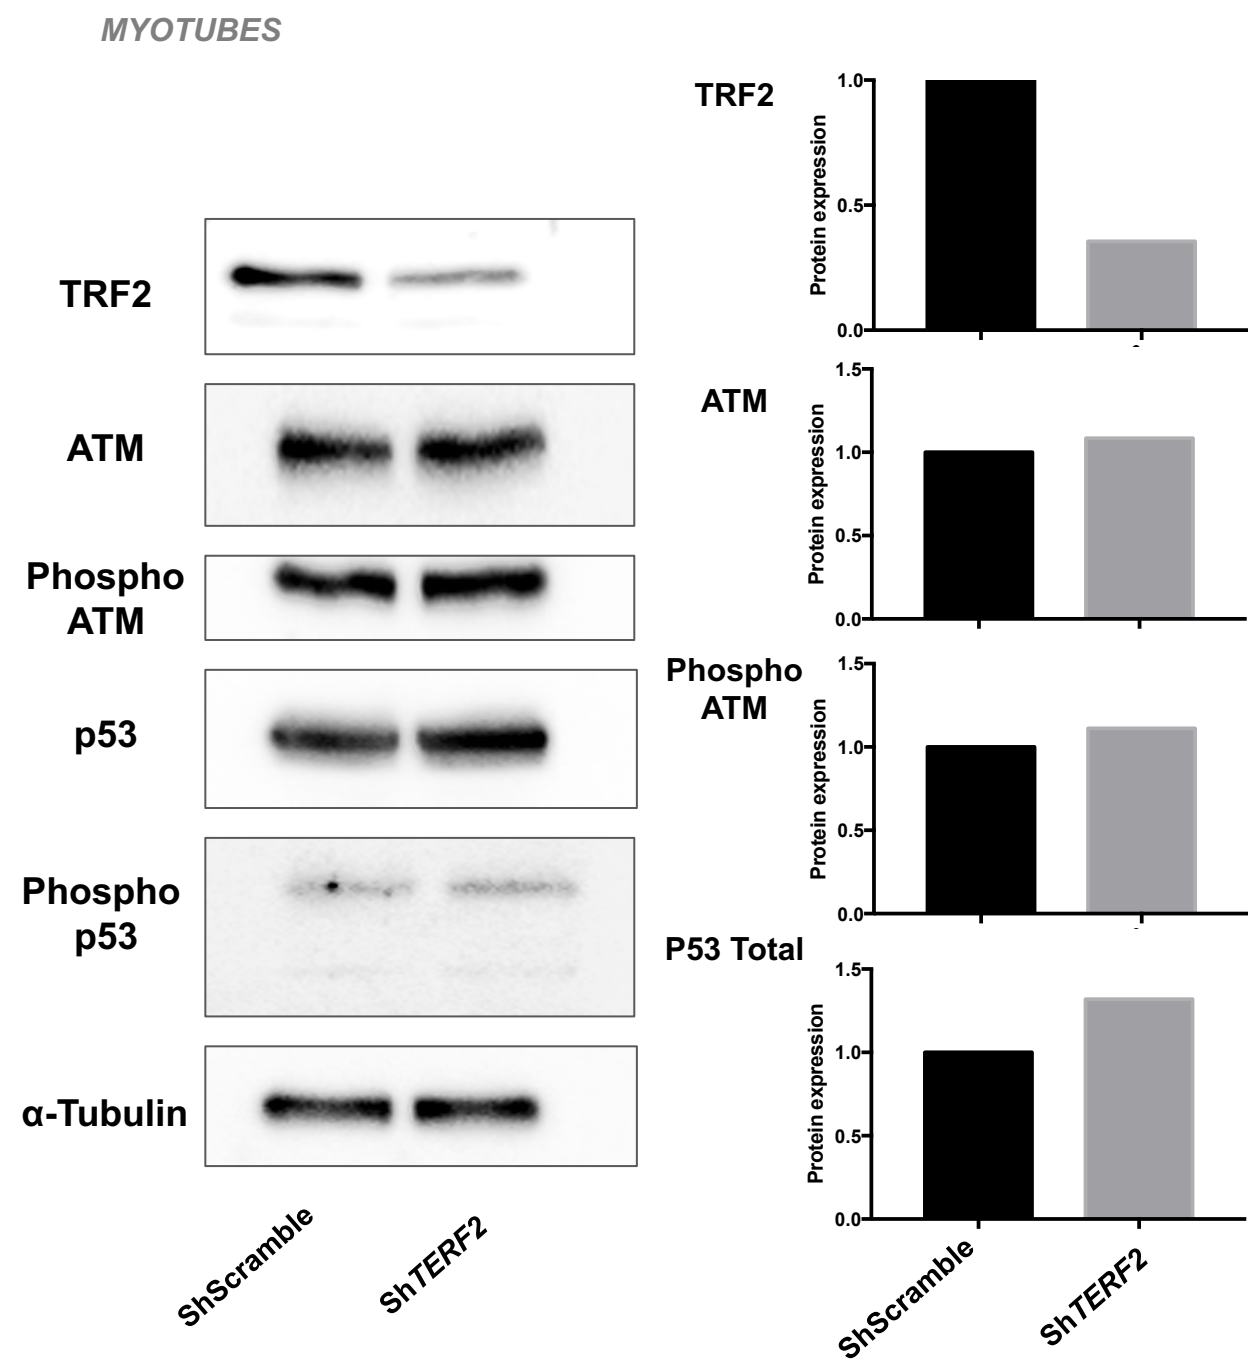

c

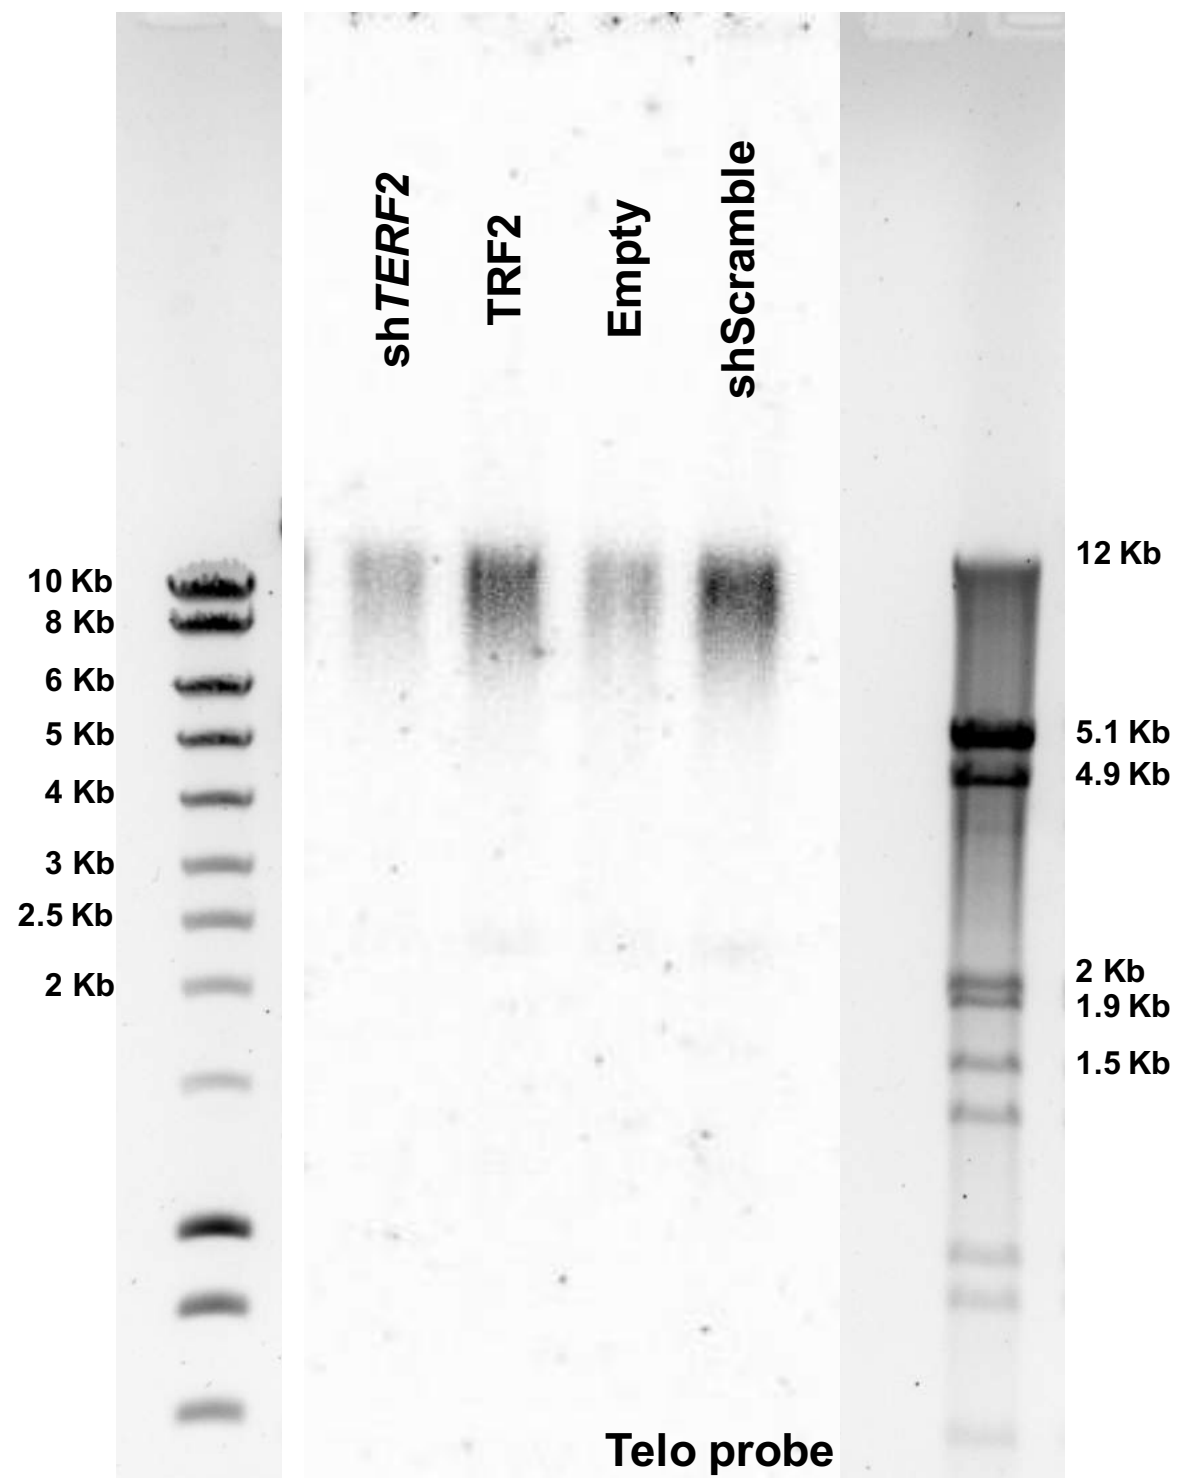



Figure S4

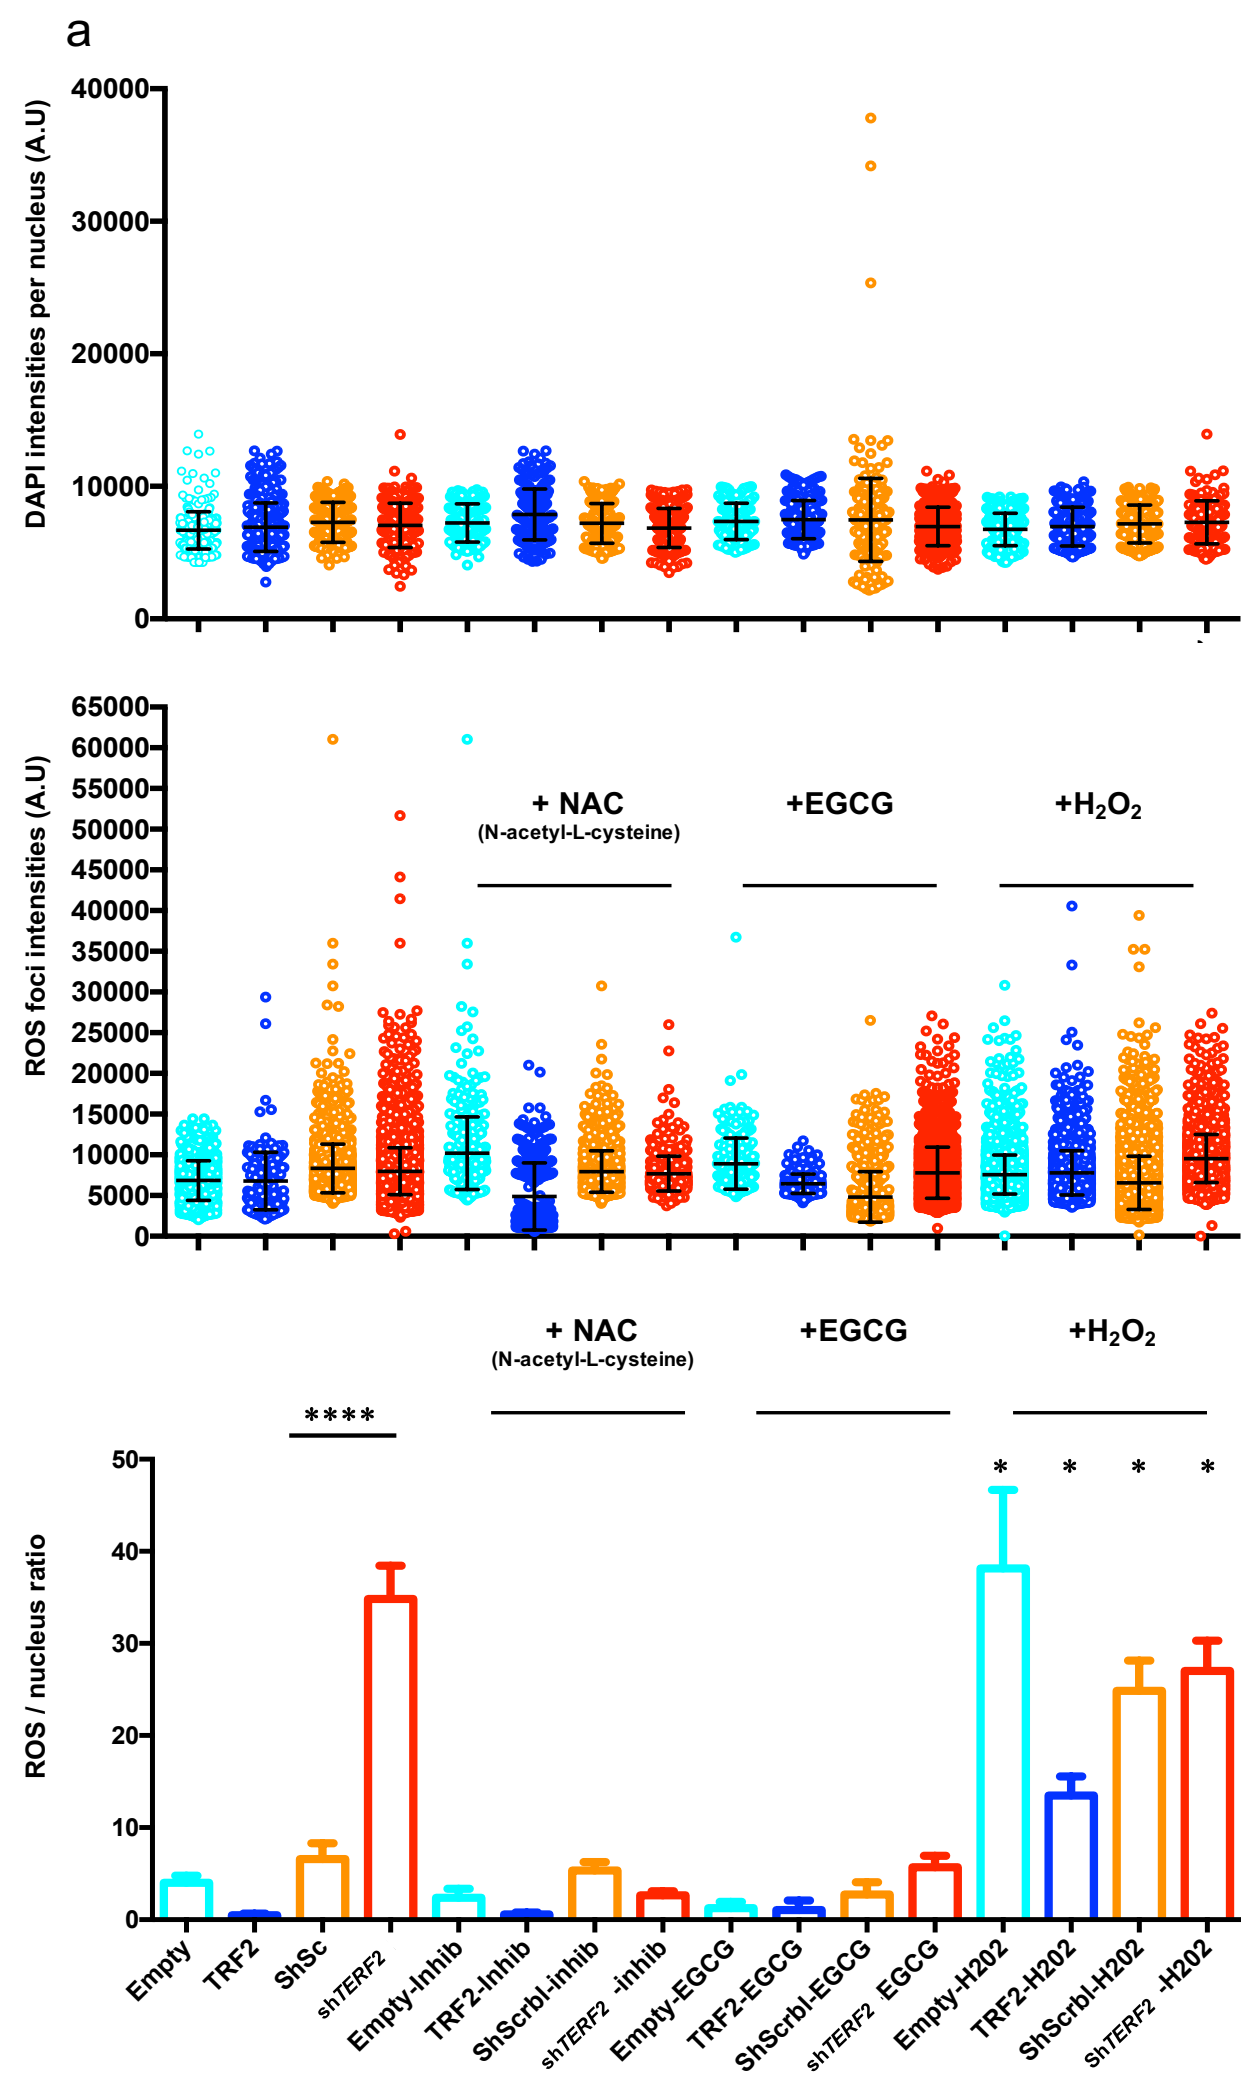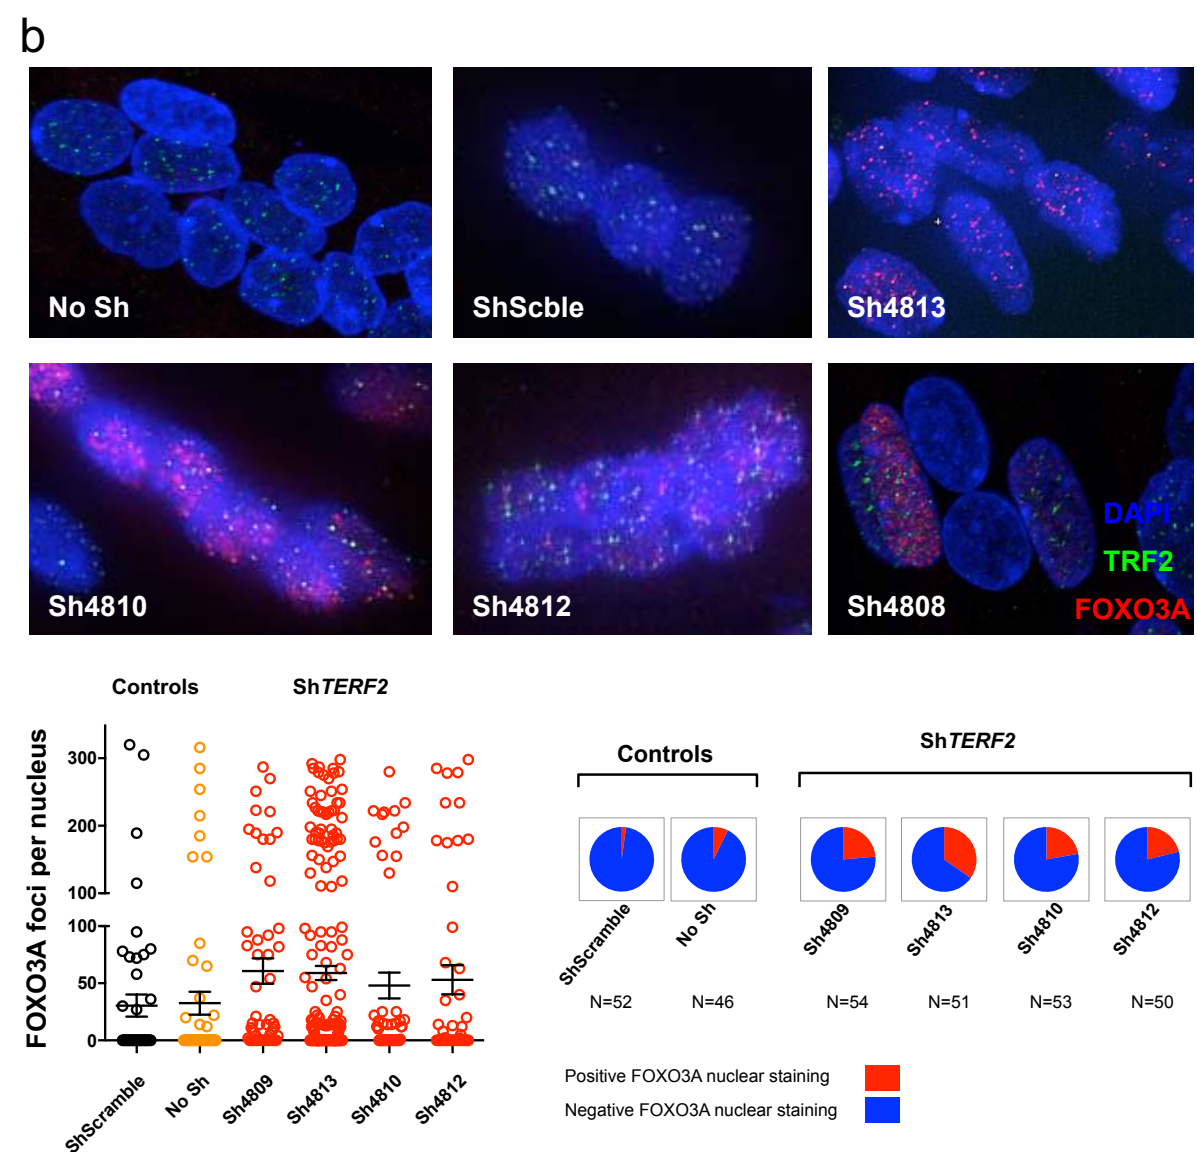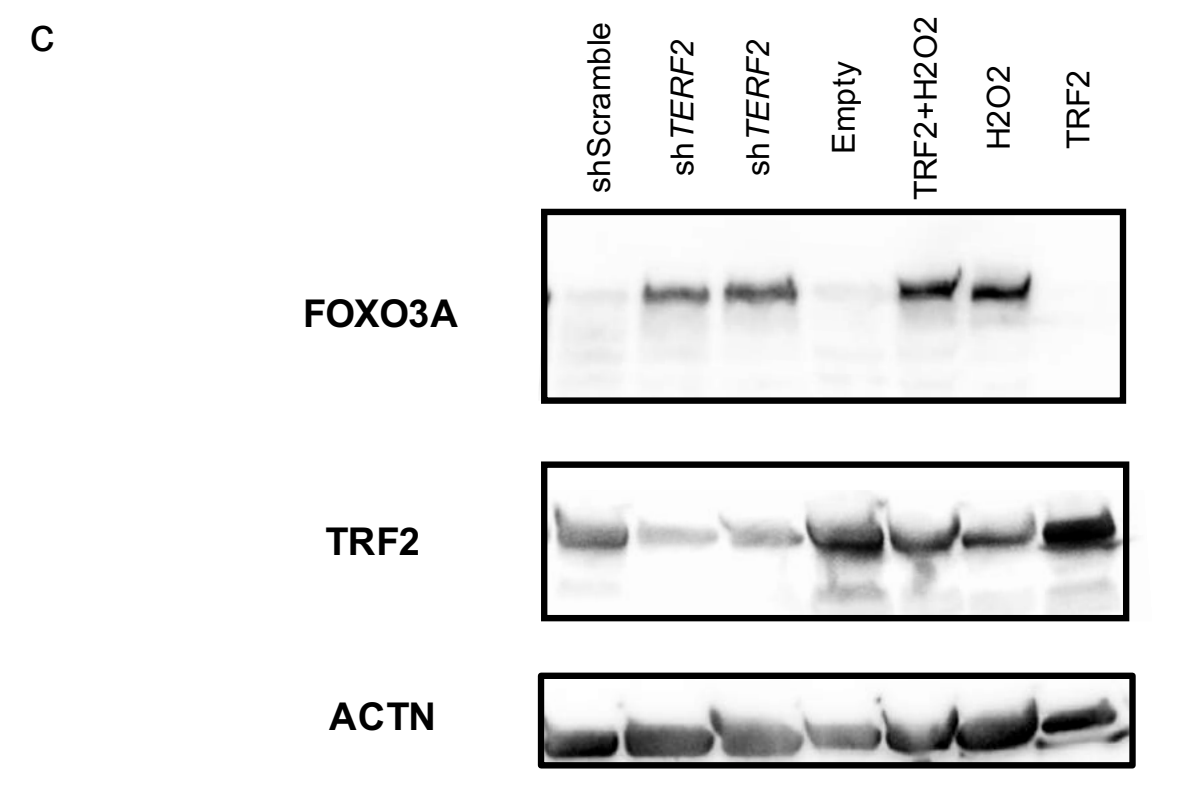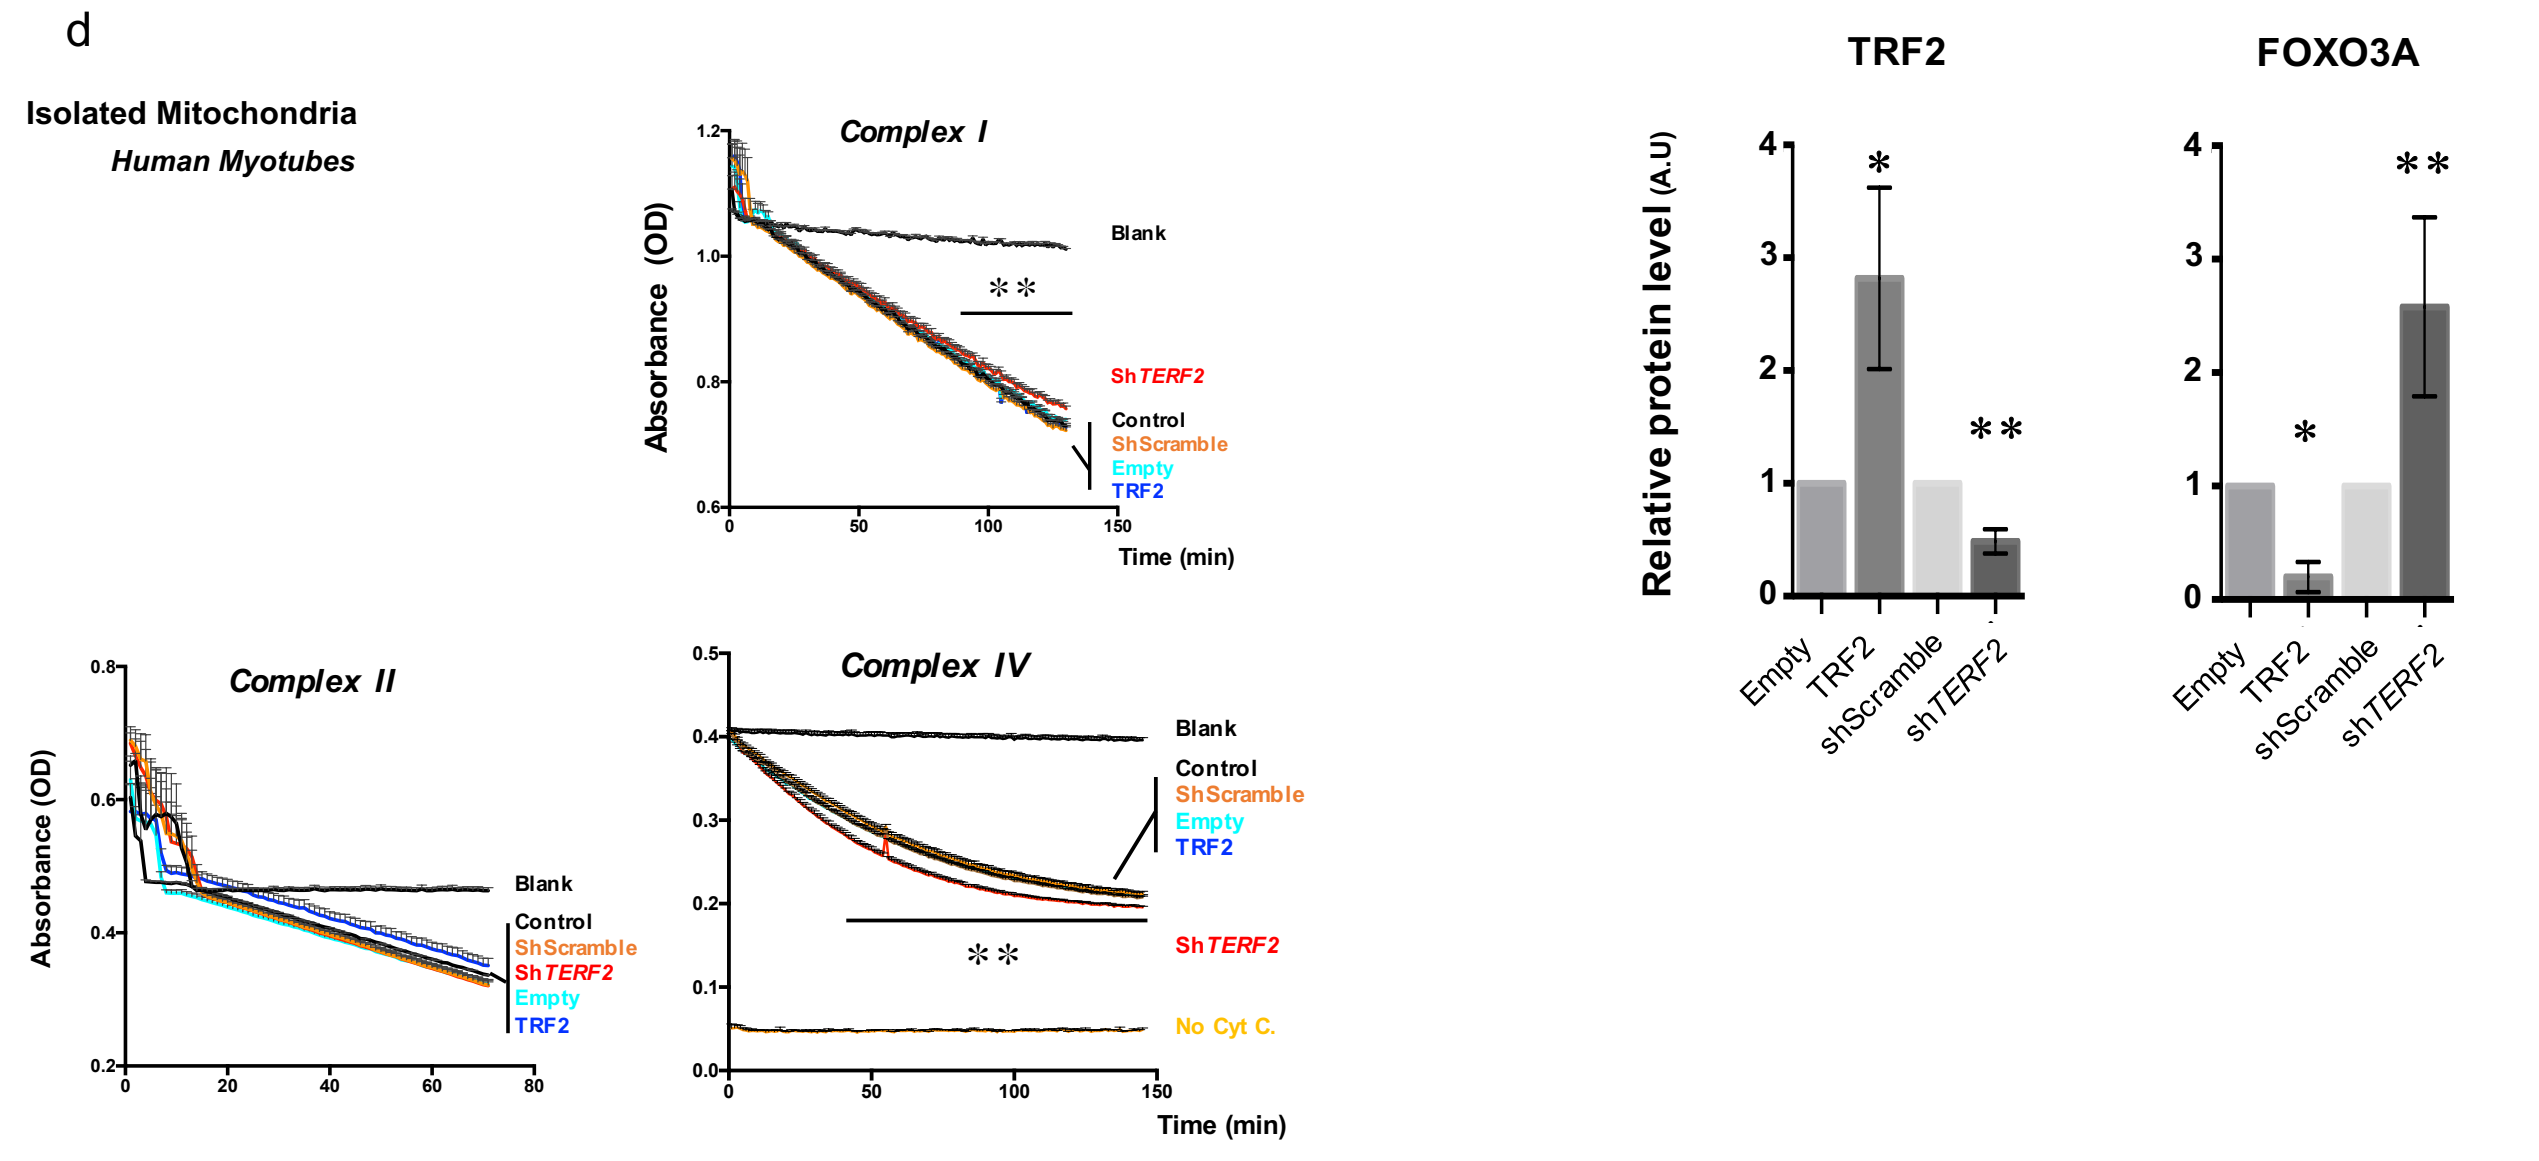



Figure S5

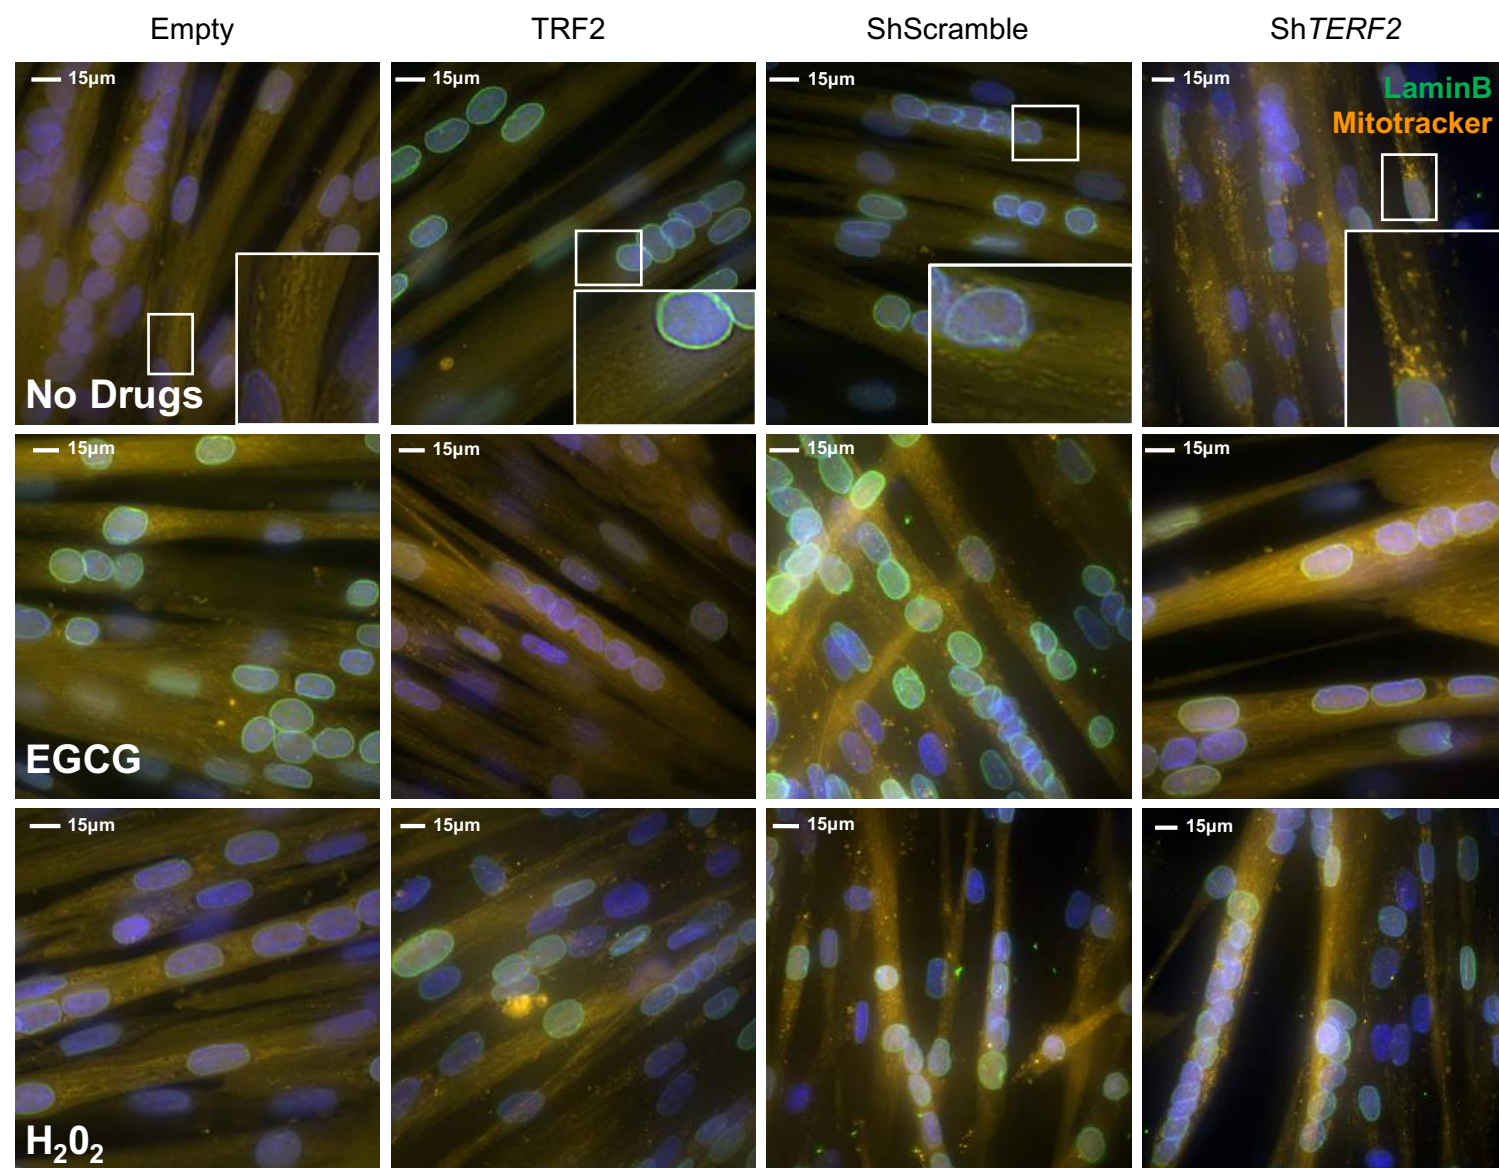

**NAD<sup>+</sup> / NADH enzymatic staining of transduced myotubes  
(NADH-TR)**

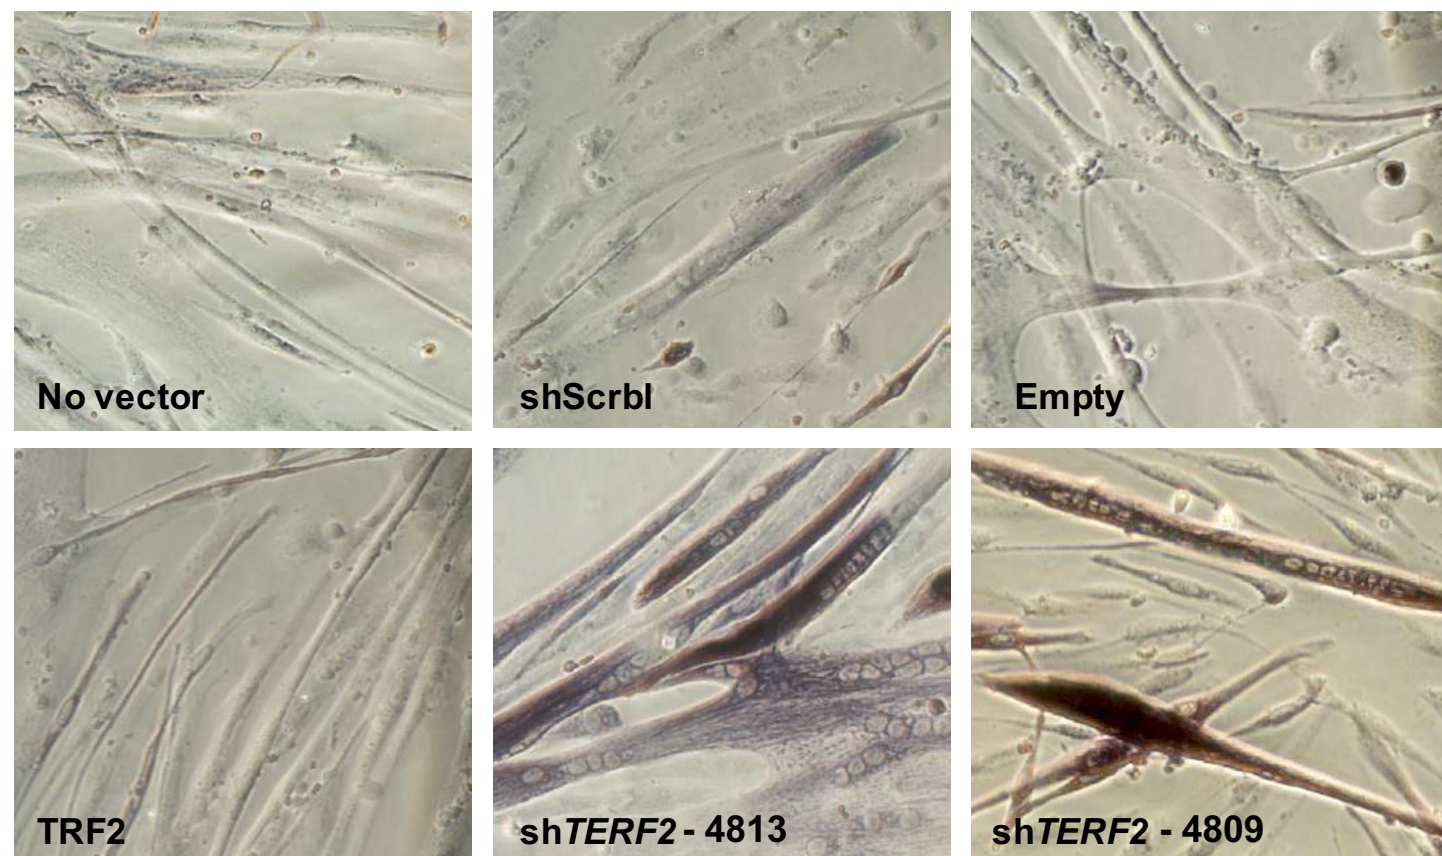



Figure S6

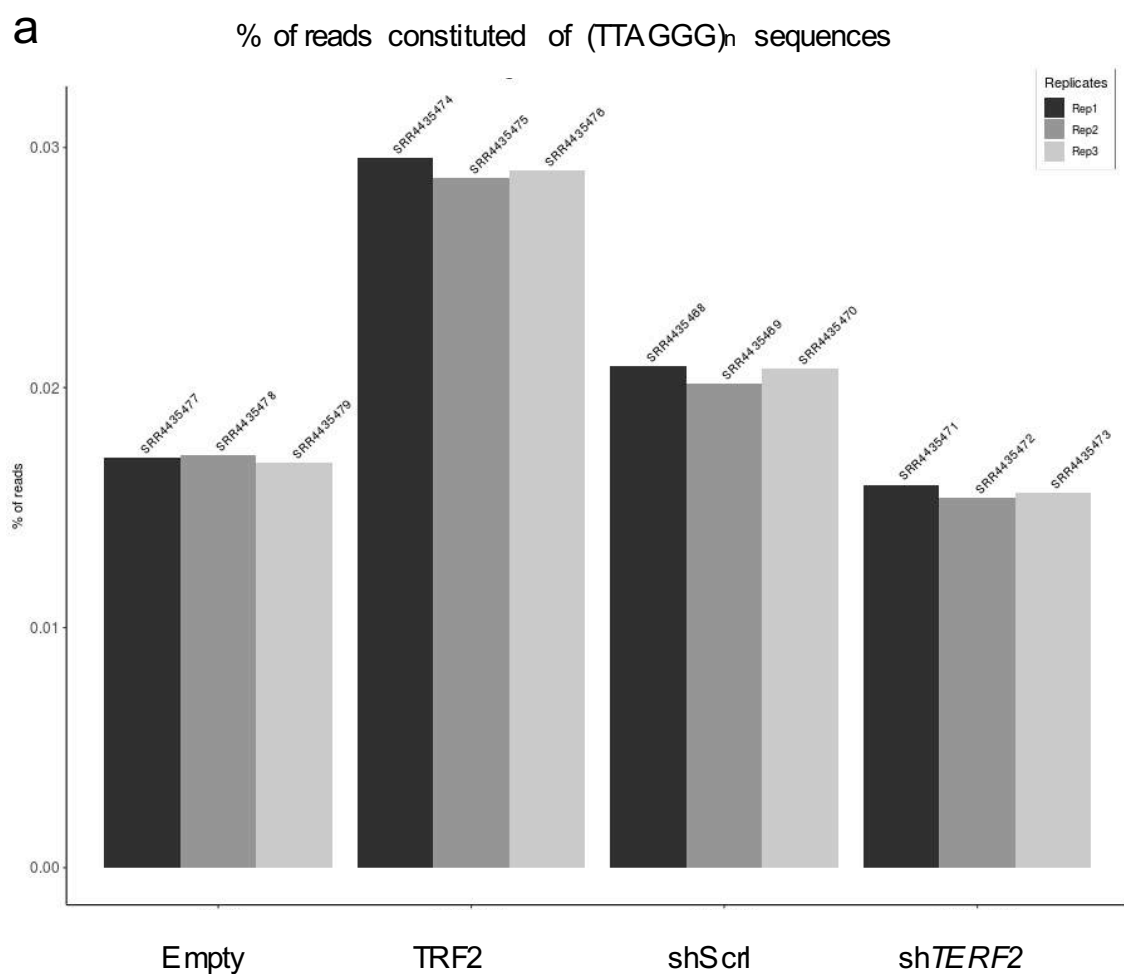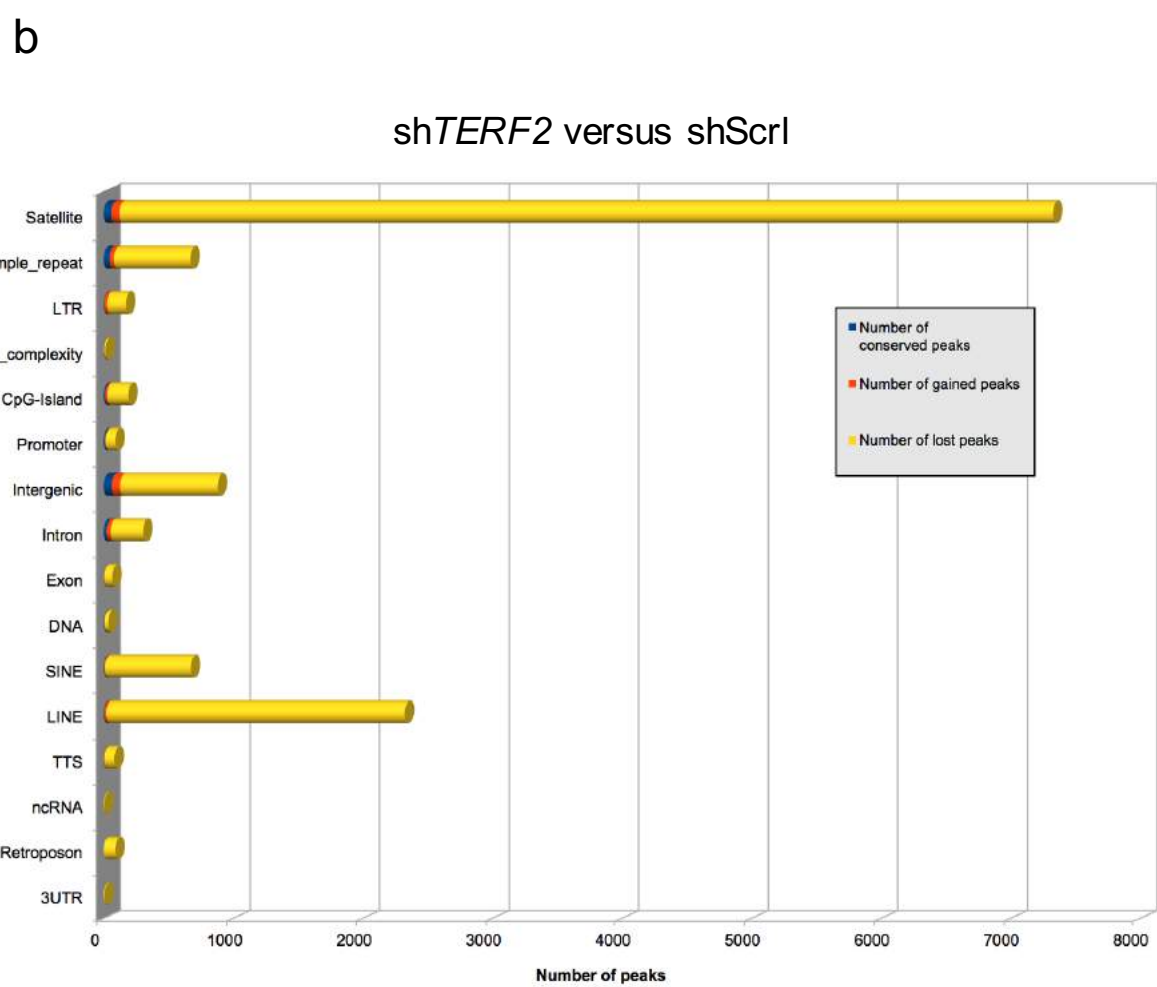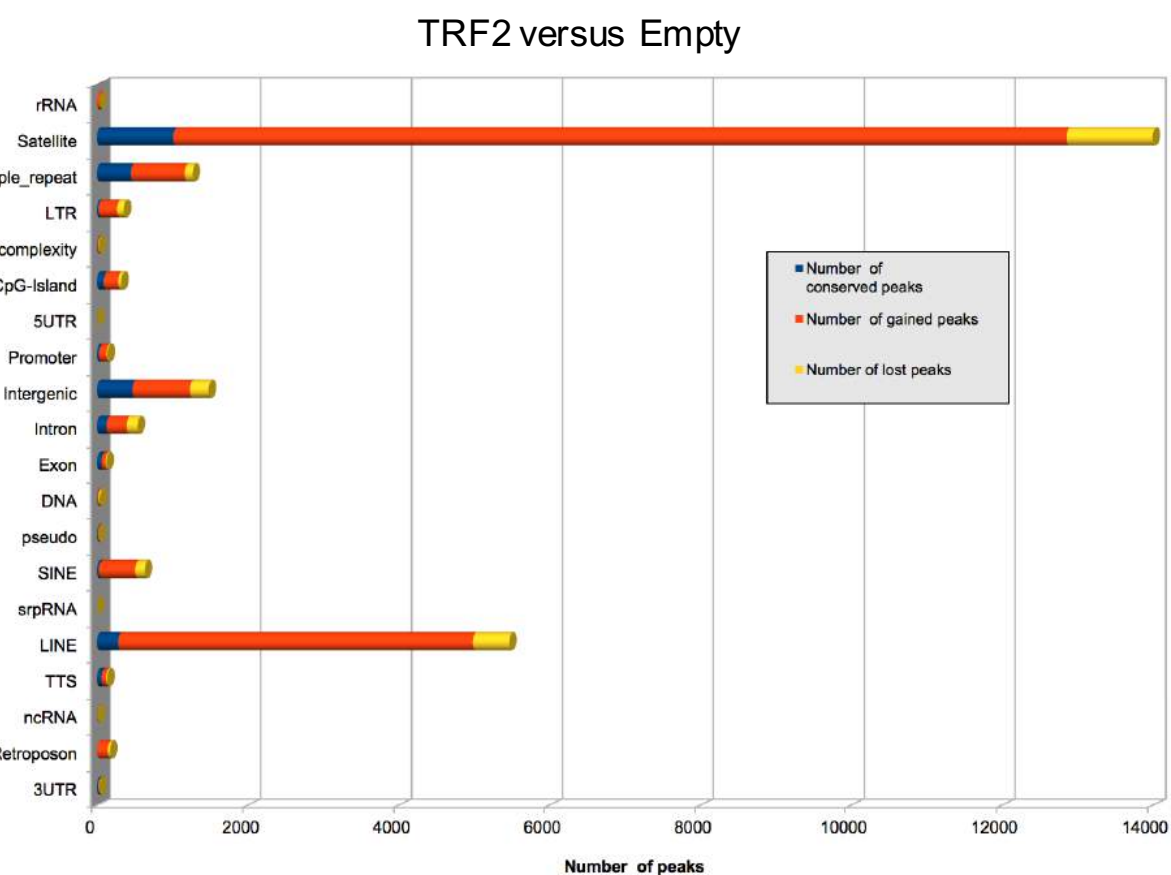

**C** Genes loss

Top Canonical Pathways

| Name                                 | p-value  | Overlap       |
|--------------------------------------|----------|---------------|
| G-Protein Coupled Receptor Signaling | 1,57E-04 | 13,5 % 38/281 |
| CREB Signaling in Neurons            | 5,09E-04 | 13,8 % 30/217 |
| GP6 Signaling Pathway                | 5,45E-04 | 15,9 % 21/132 |
| Netrin Signaling                     | 6,98E-04 | 20,0 % 13/65  |
| cAMP-mediated signaling              | 8,63E-04 | 13,4 % 30/224 |

|                    | GO term    | Description                                                              | P-value |
|--------------------|------------|--------------------------------------------------------------------------|---------|
| Biological process | GO:0007186 | G protein-coupled receptor signaling pathway                             | 5.69E-9 |
|                    | GO:0007187 | G protein-coupled recep sign path, coupled to cyclic nt second messenger | 2.23E-6 |
|                    | GO:0046777 | protein autophosphorylation                                              | 5.92E-5 |
|                    | GO:0007165 | signal transduction                                                      | 8.98E-5 |
|                    | GO:0007193 | adenylate cyclase-inhibiting G protein-coupled recep signaling pathway   | 2.14E-4 |
|                    | GO:0007188 | adenylate cyclase-modulating G protein-coupled recep signaling pathway   | 2.32E-4 |
|                    | GO:0065007 | biological regulation                                                    | 2.91E-4 |
|                    | GO:0065008 | regulation of biological quality                                         | 5.24E-4 |
|                    | GO:0006796 | phosphate-containing compound metabolic process                          | 7.14E-4 |
|                    | GO:0006793 | phosphorus metabolic process                                             | 7.14E-4 |
| Molecular function | GO:1901564 | organonitrogen compound metabolic process                                | 9.26E-4 |
|                    | GO:0044248 | cellular catabolic process                                               | 9.84E-4 |
|                    | GO:0004930 | G protein-coupled receptor activity                                      | 1.43E-6 |
| Cellular component | GO:0099528 | G protein-coupled neurotransmitter receptor activity                     | 5.04E-5 |
|                    | GO:0003824 | catalytic activity                                                       | 1.13E-4 |
|                    | GO:0044425 | membrane part                                                            | 1.66E-4 |
|                    | GO:0005887 | integral component of plasma membrane                                    | 6.18E-4 |

Genes gain

Top Canonical Pathways

| Name                               | p-value  | Overlap       |
|------------------------------------|----------|---------------|
| Leukocyte Extravasation Signaling  | 3,64E-03 | 11,1 % 23/208 |
| Netrin Signaling                   | 5,27E-03 | 15,4 % 10/65  |
| Choline Biosynthesis III           | 6,04E-03 | 30,8 % 4/13   |
| Protein Kinase A Signaling         | 9,42E-03 | 9,1 % 35/383  |
| Iron homeostasis signaling pathway | 1,24E-02 | 11,5 % 15/131 |

|                    | GO term    | Description                                           | P-value |
|--------------------|------------|-------------------------------------------------------|---------|
| Biological process | GO:0022610 | biological adhesion                                   | 4.41E-5 |
|                    | GO:0007155 | cell adhesion                                         | 4.41E-5 |
|                    | GO:0098609 | cell-cell adhesion                                    | 9.05E-5 |
|                    | GO:0032879 | regulation of localization                            | 1.16E-4 |
|                    | GO:0030198 | extracellular matrix organization                     | 1.41E-4 |
|                    | GO:0043062 | extracellular structure organization                  | 1.41E-4 |
|                    | GO:0071840 | cellular component organization or biogenesis         | 1.43E-4 |
|                    | GO:0016043 | cellular component organization                       | 1.43E-4 |
|                    | GO:0033554 | cellular response to stress                           | 4.42E-4 |
|                    | GO:0040012 | regulation of locomotion                              | 6.51E-4 |
|                    | GO:2000145 | regulation of cell motility                           | 6.51E-4 |
|                    | GO:0051894 | positive regulation of focal adhesion assembly        | 7.02E-4 |
|                    | GO:0010811 | positive regulation of cell-substrate adhesion        | 7.02E-4 |
|                    | GO:0001954 | positive regulation of cell-matrix adhesion           | 7.02E-4 |
|                    | GO:1901890 | positive regulation of cell junction assembly         | 7.02E-4 |
|                    | GO:1903393 | positive regulation of adherens junction organization | 7.02E-4 |
|                    | GO:0002376 | immune system process                                 | 7.67E-4 |
|                    | GO:0034613 | cellular protein localization                         | 7.85E-4 |
|                    | GO:0070727 | cellular macromolecule localization                   | 7.85E-4 |
|                    | GO:0051270 | regulation of cellular component movement             | 7.85E-4 |
| Molecular function | GO:0048523 | negative regulation of cellular process               | 8.88E-4 |
|                    | GO:0050789 | regulation of biological process                      | 9.42E-4 |
| Cellular component | GO:0031267 | small GTPase binding                                  | 3.69E-4 |
|                    | GO:0017016 | Ras GTPase binding                                    | 3.69E-4 |
|                    | GO:0051020 | GTPase binding                                        | 3.69E-4 |
|                    | GO:0017048 | Rho GTPase binding                                    | 3.69E-4 |
|                    | GO:0030054 | cell junction                                         | 1.94E-5 |
|                    | GO:0005911 | cell-cell junction                                    | 9.19E-5 |
|                    | GO:0043229 | intracellular organelle                               | 8.44E-4 |
|                    | GO:0070161 | anchoring junction                                    | 8.78E-4 |
|                    | GO:0005886 | plasma membrane                                       | 9.49E-4 |

Figure S7

a

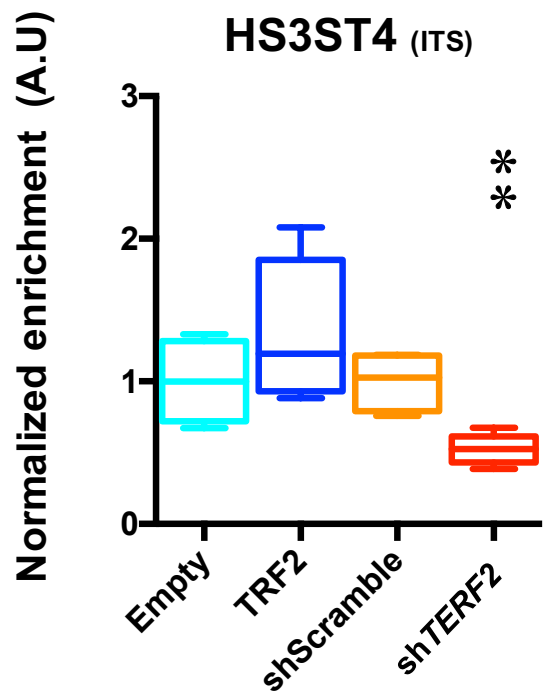

b

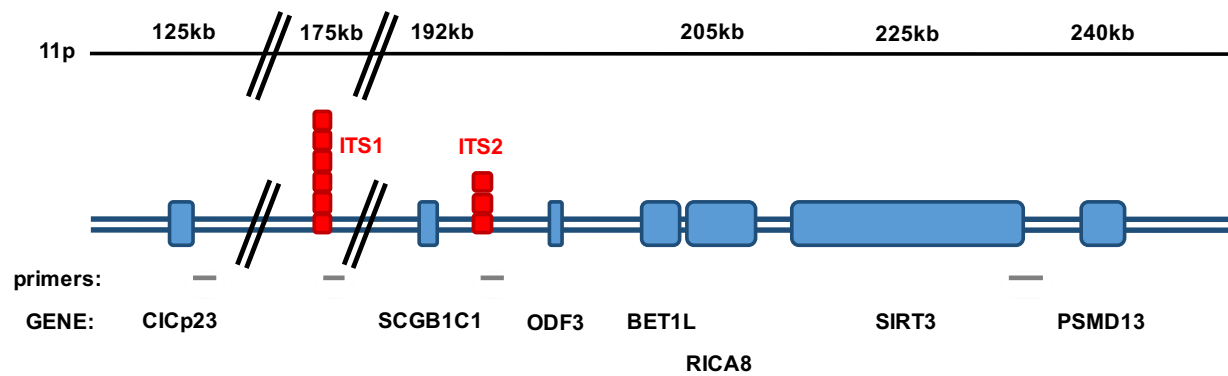

c

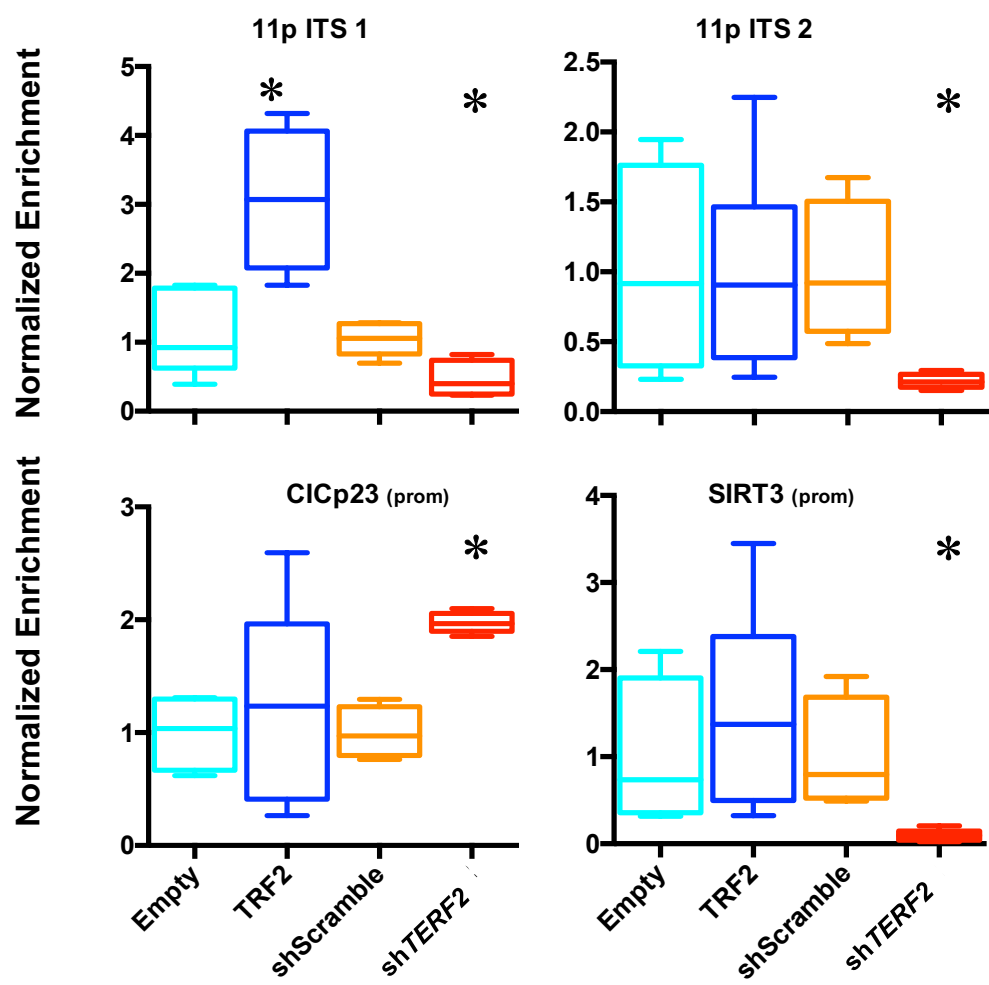

d

**MYOBLASTS**

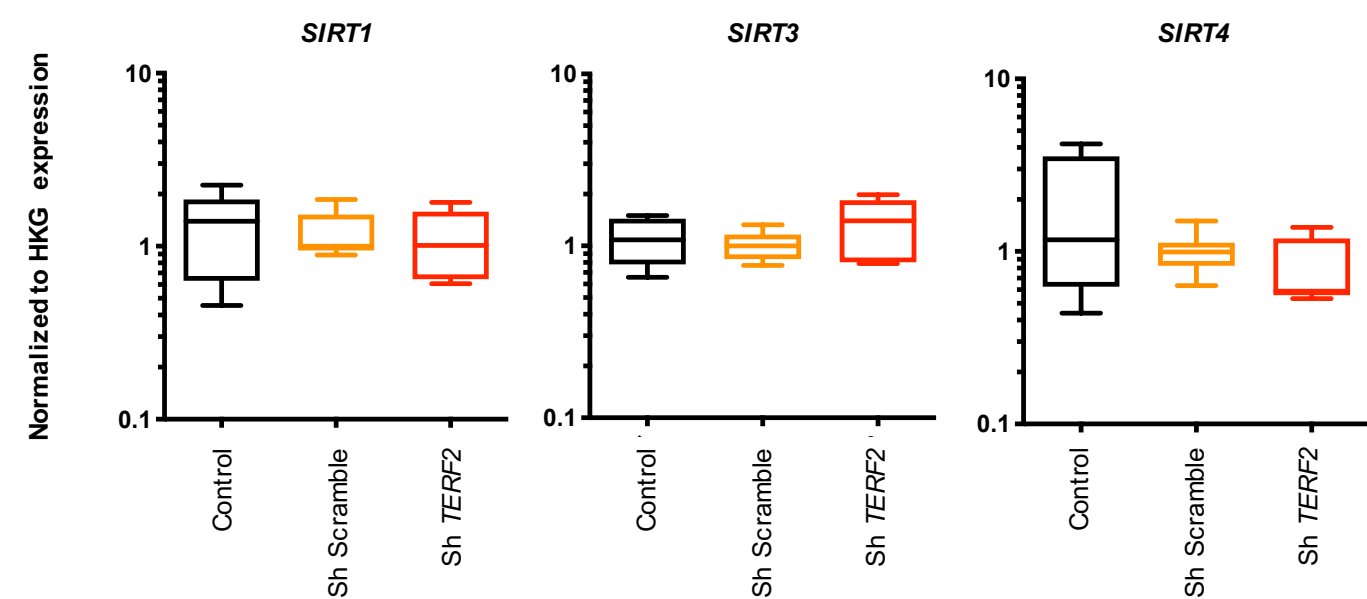

e

**MYOTUBES**

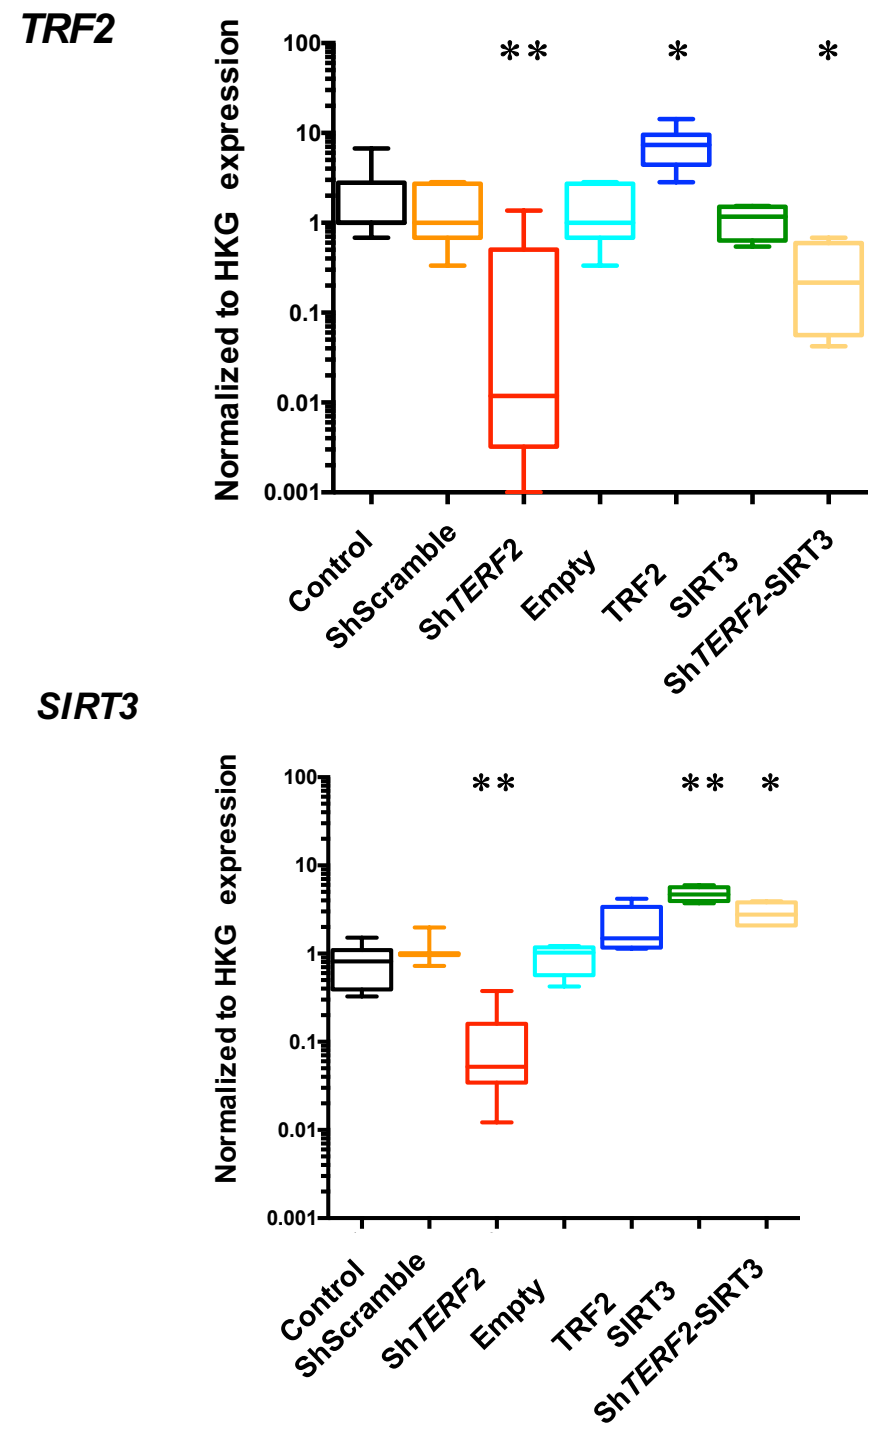

f

**Isolated Mitochondria  
Human Myotubes**

**Complex II**

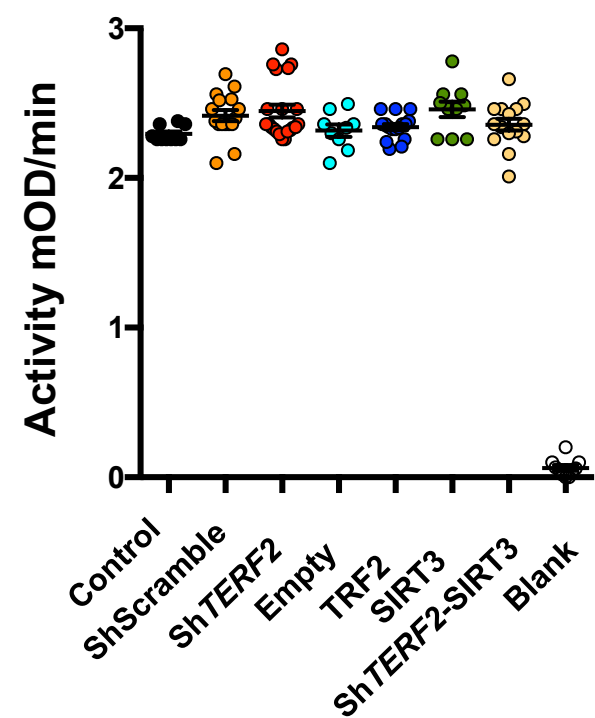

**Complex IV**

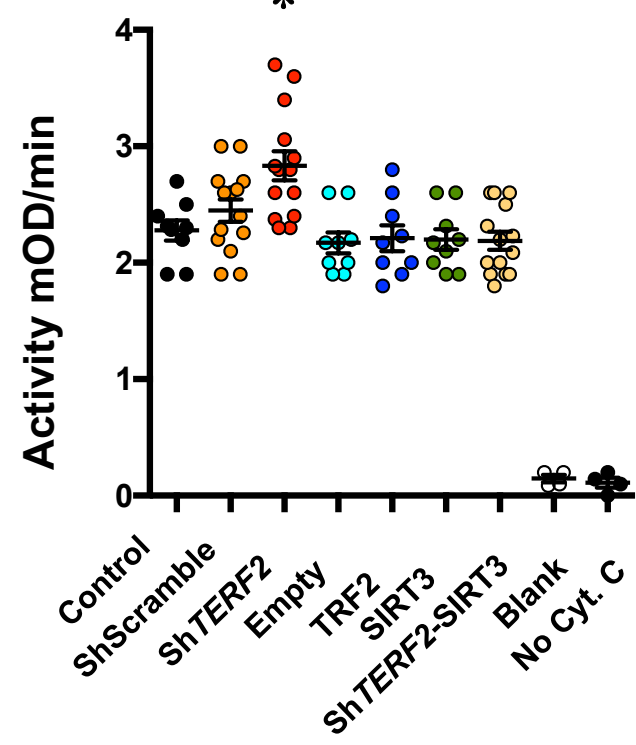

Figure S8

a

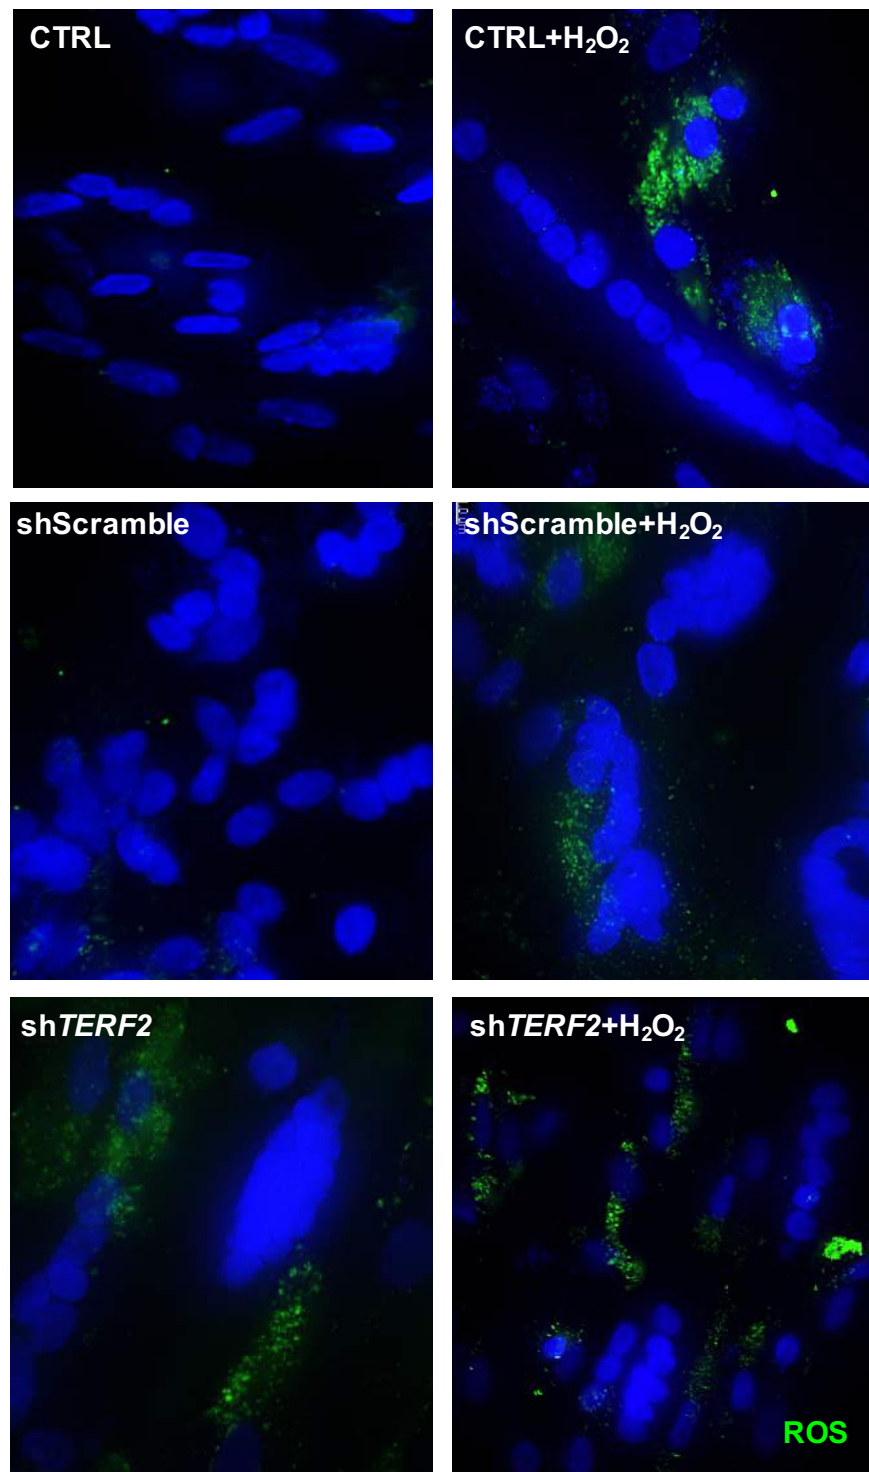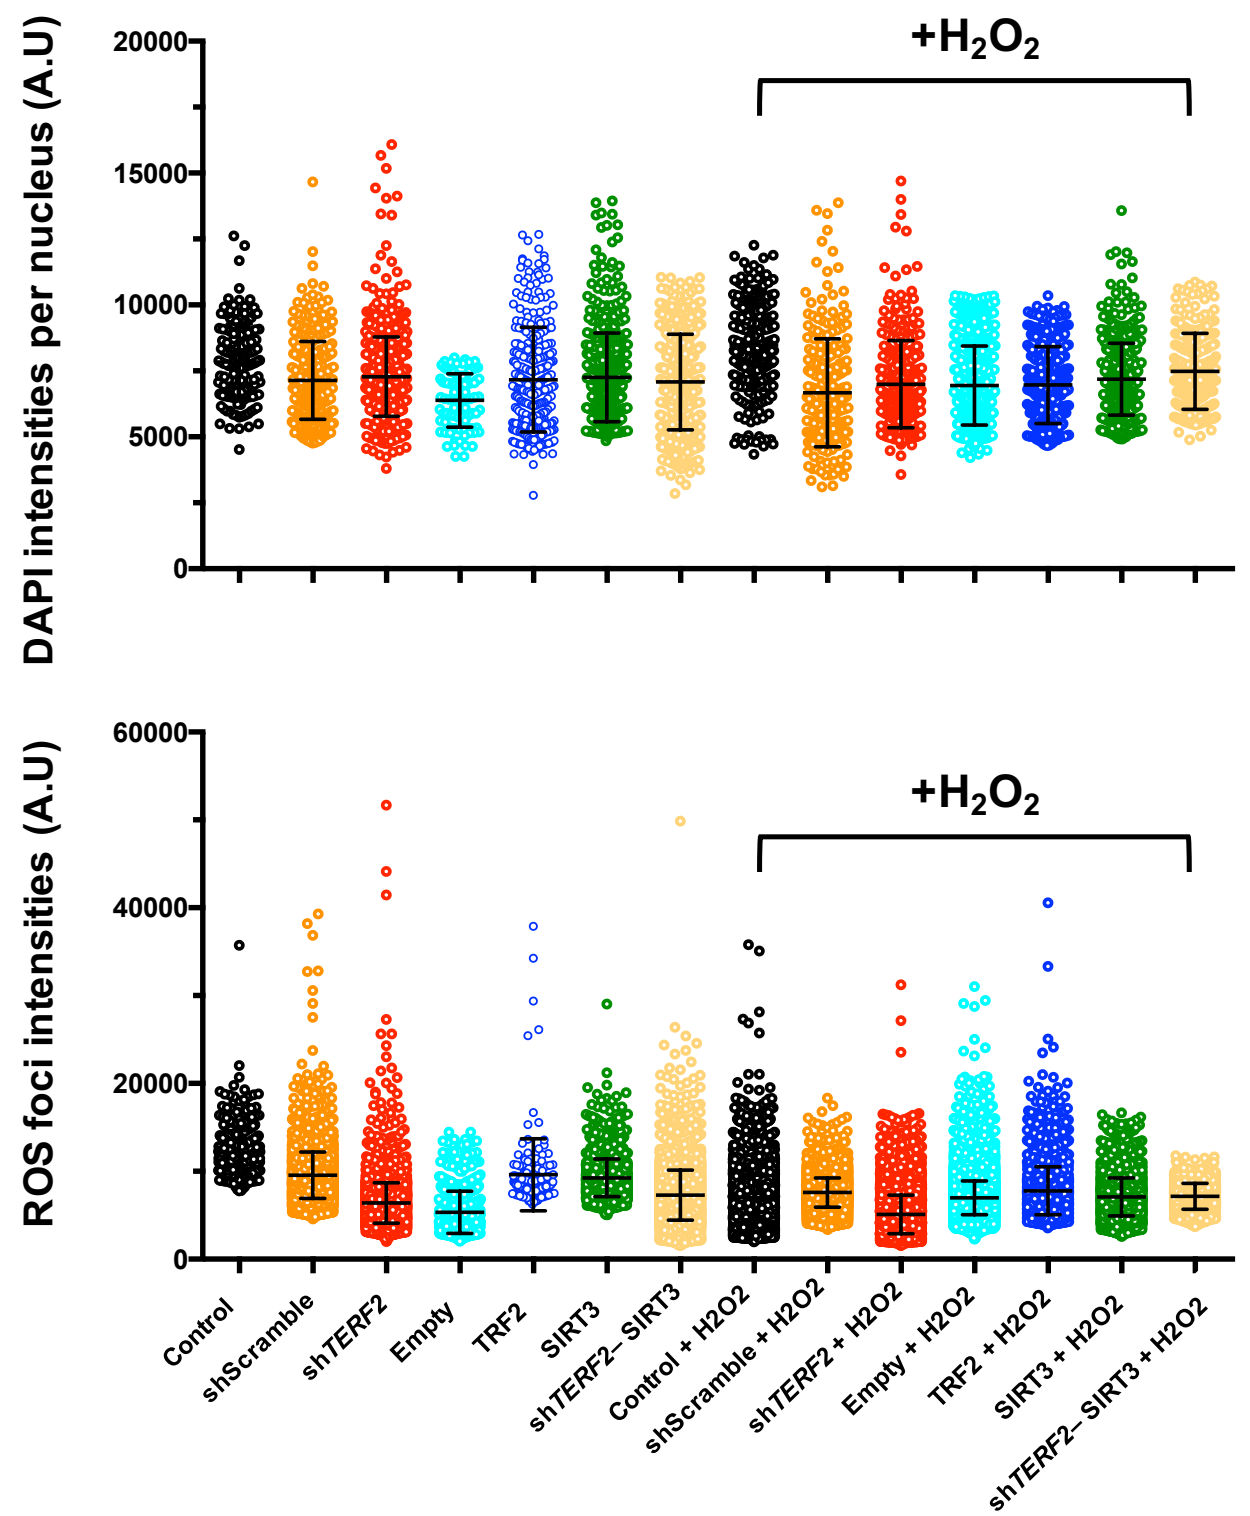

b

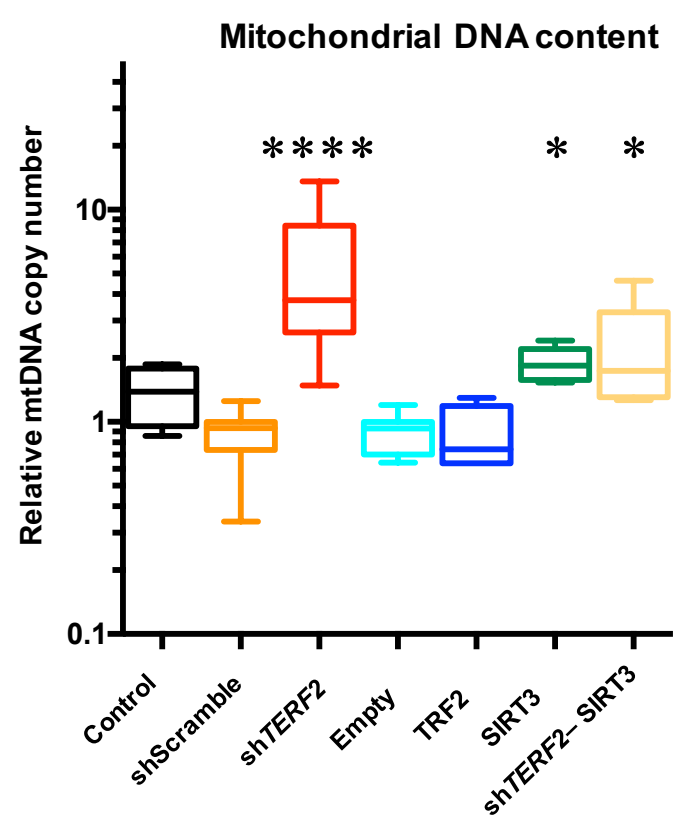



Figure S9

a

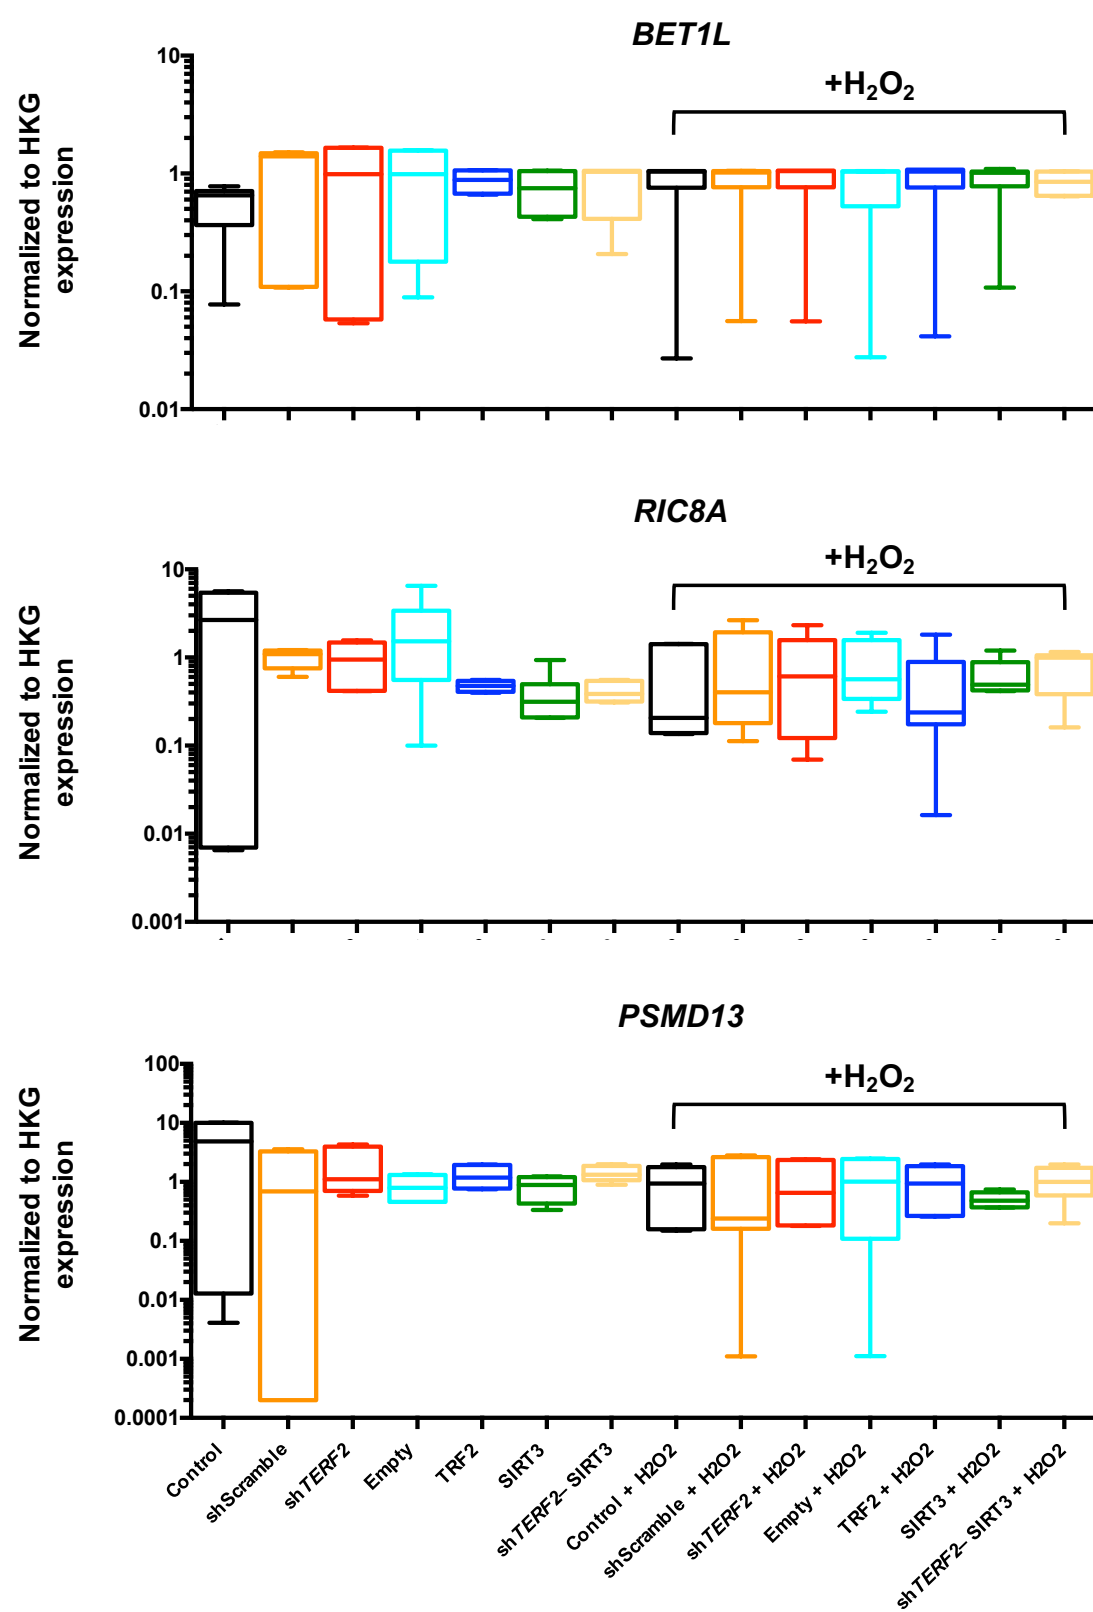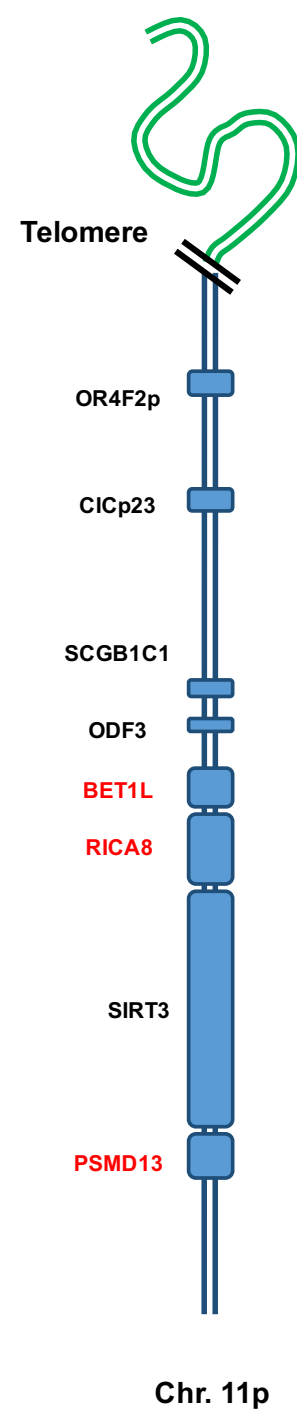

b

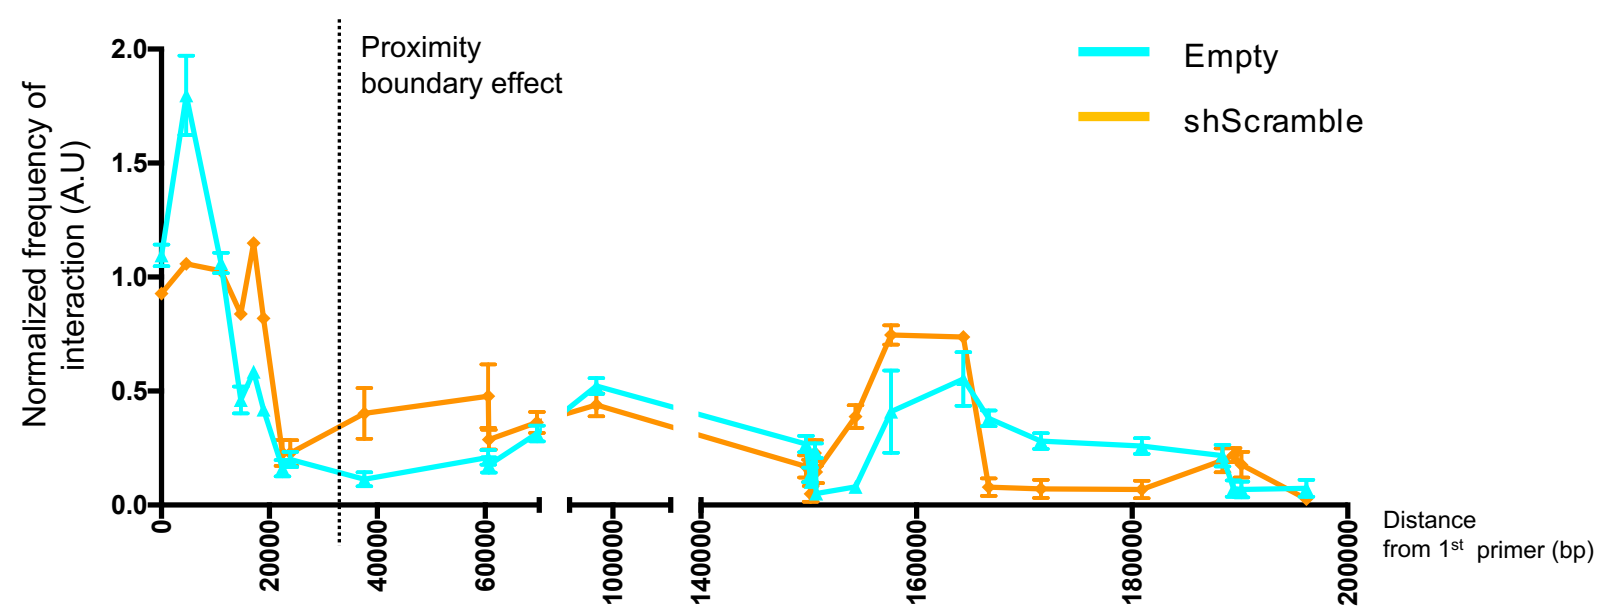

c

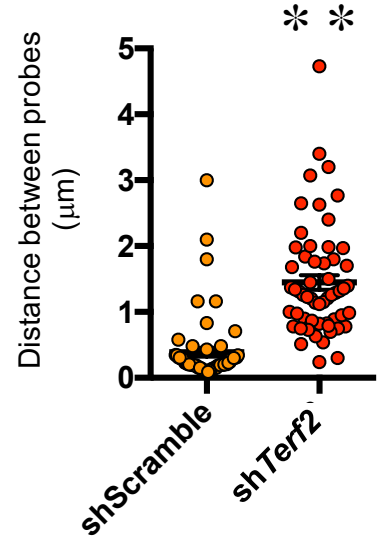

c *Mouse Embryonic Fibroblasts* (Mitotically arrested)

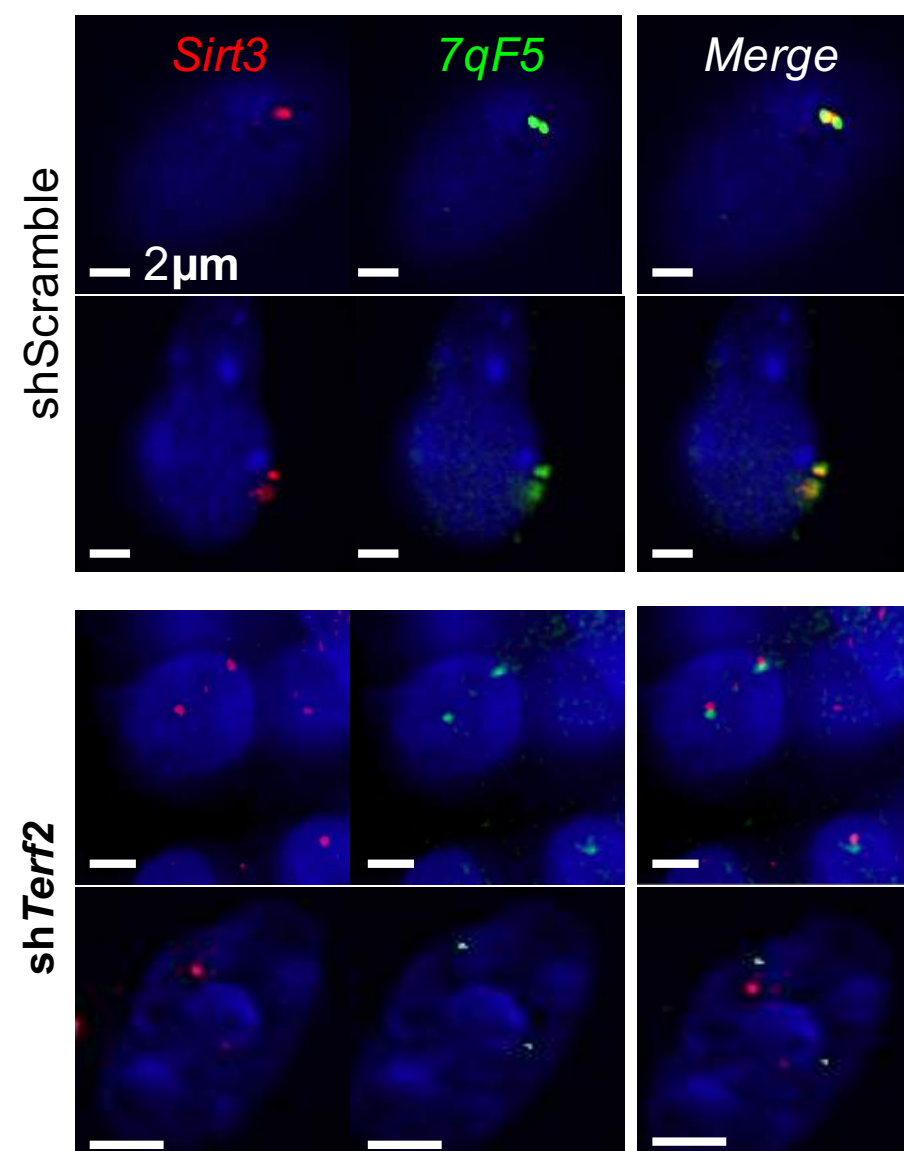



Figure S10

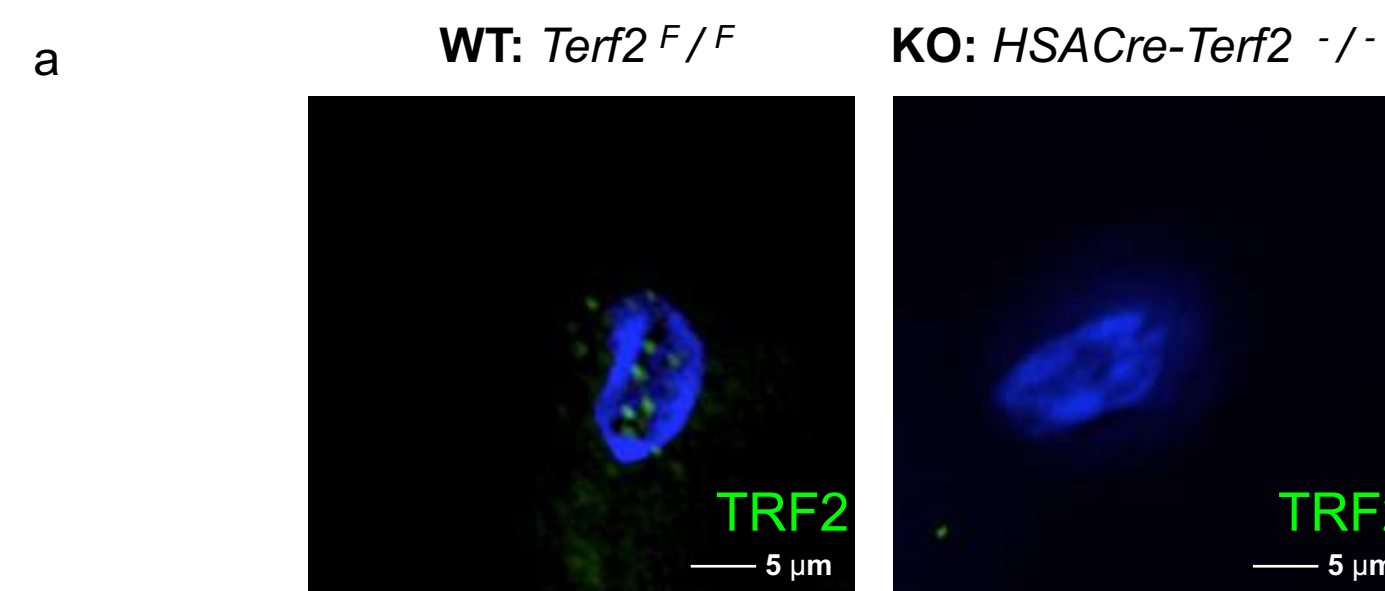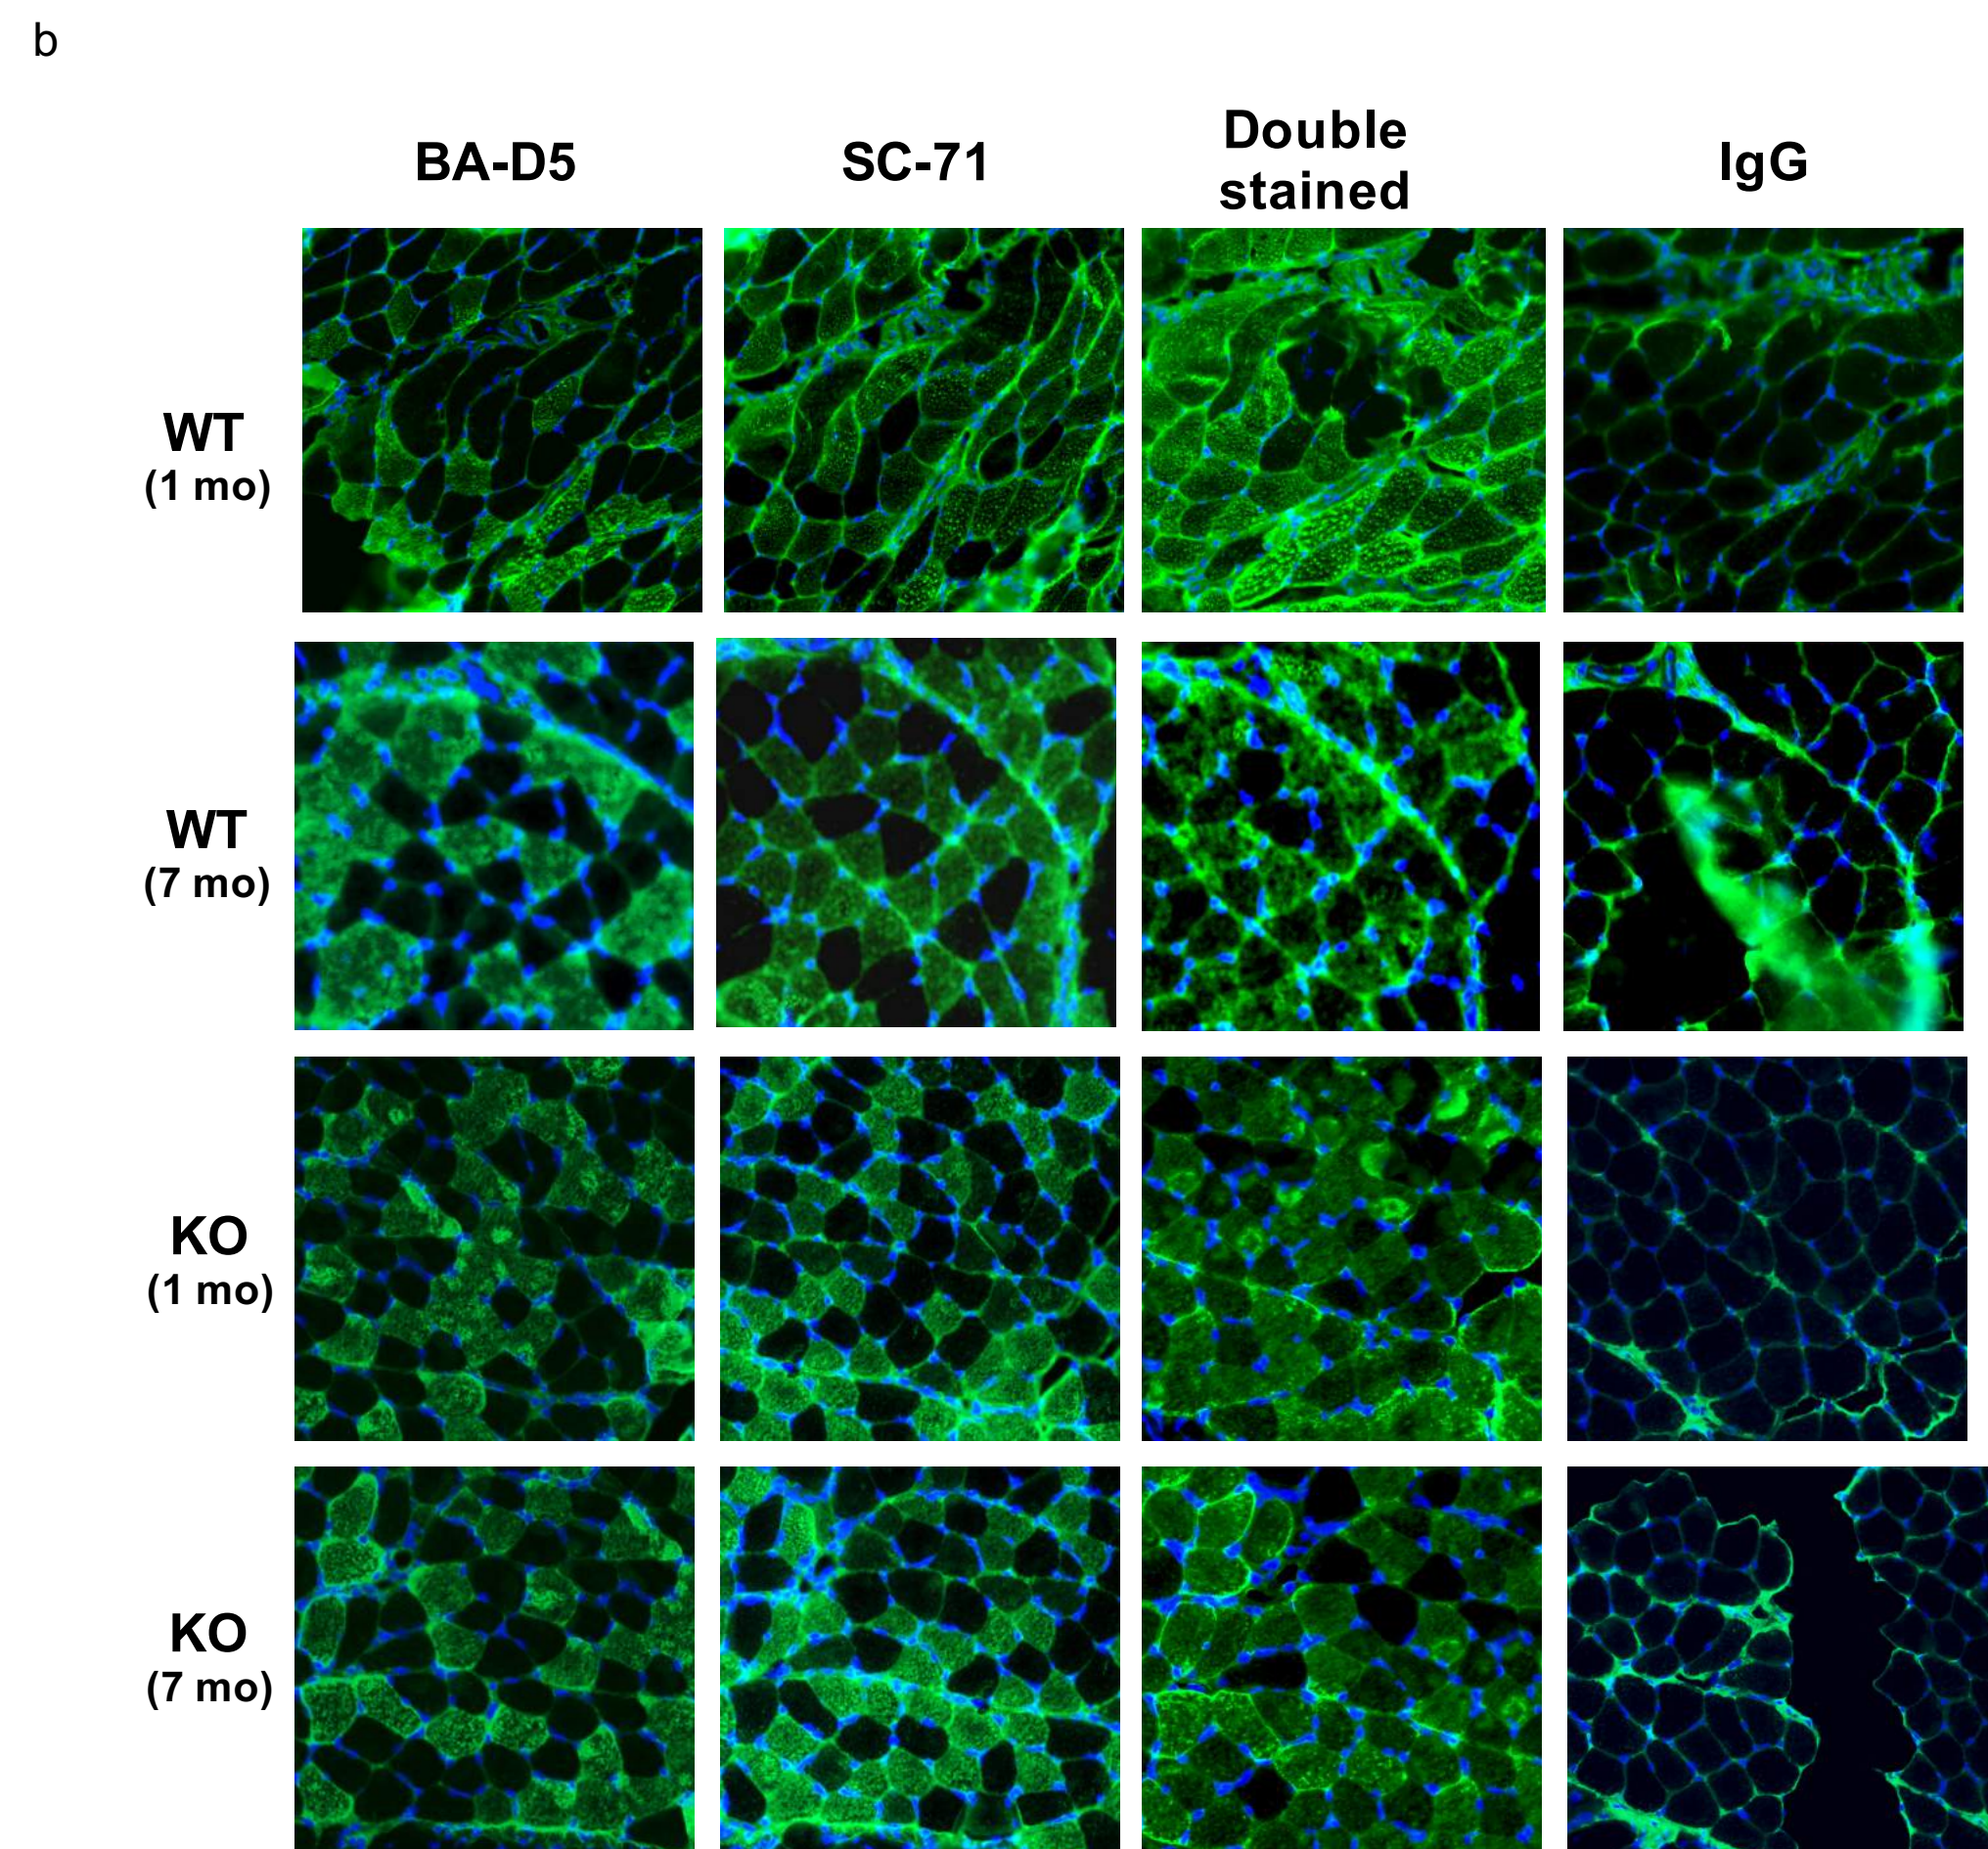

**BA-D5 staining** : fiber Type I determination

**SC-71 staining** : fiber Type IIa determination

**Double staining** : unidentified fiber Type (as not stained fibers)

**IgG** : negative control



Figure S11

a

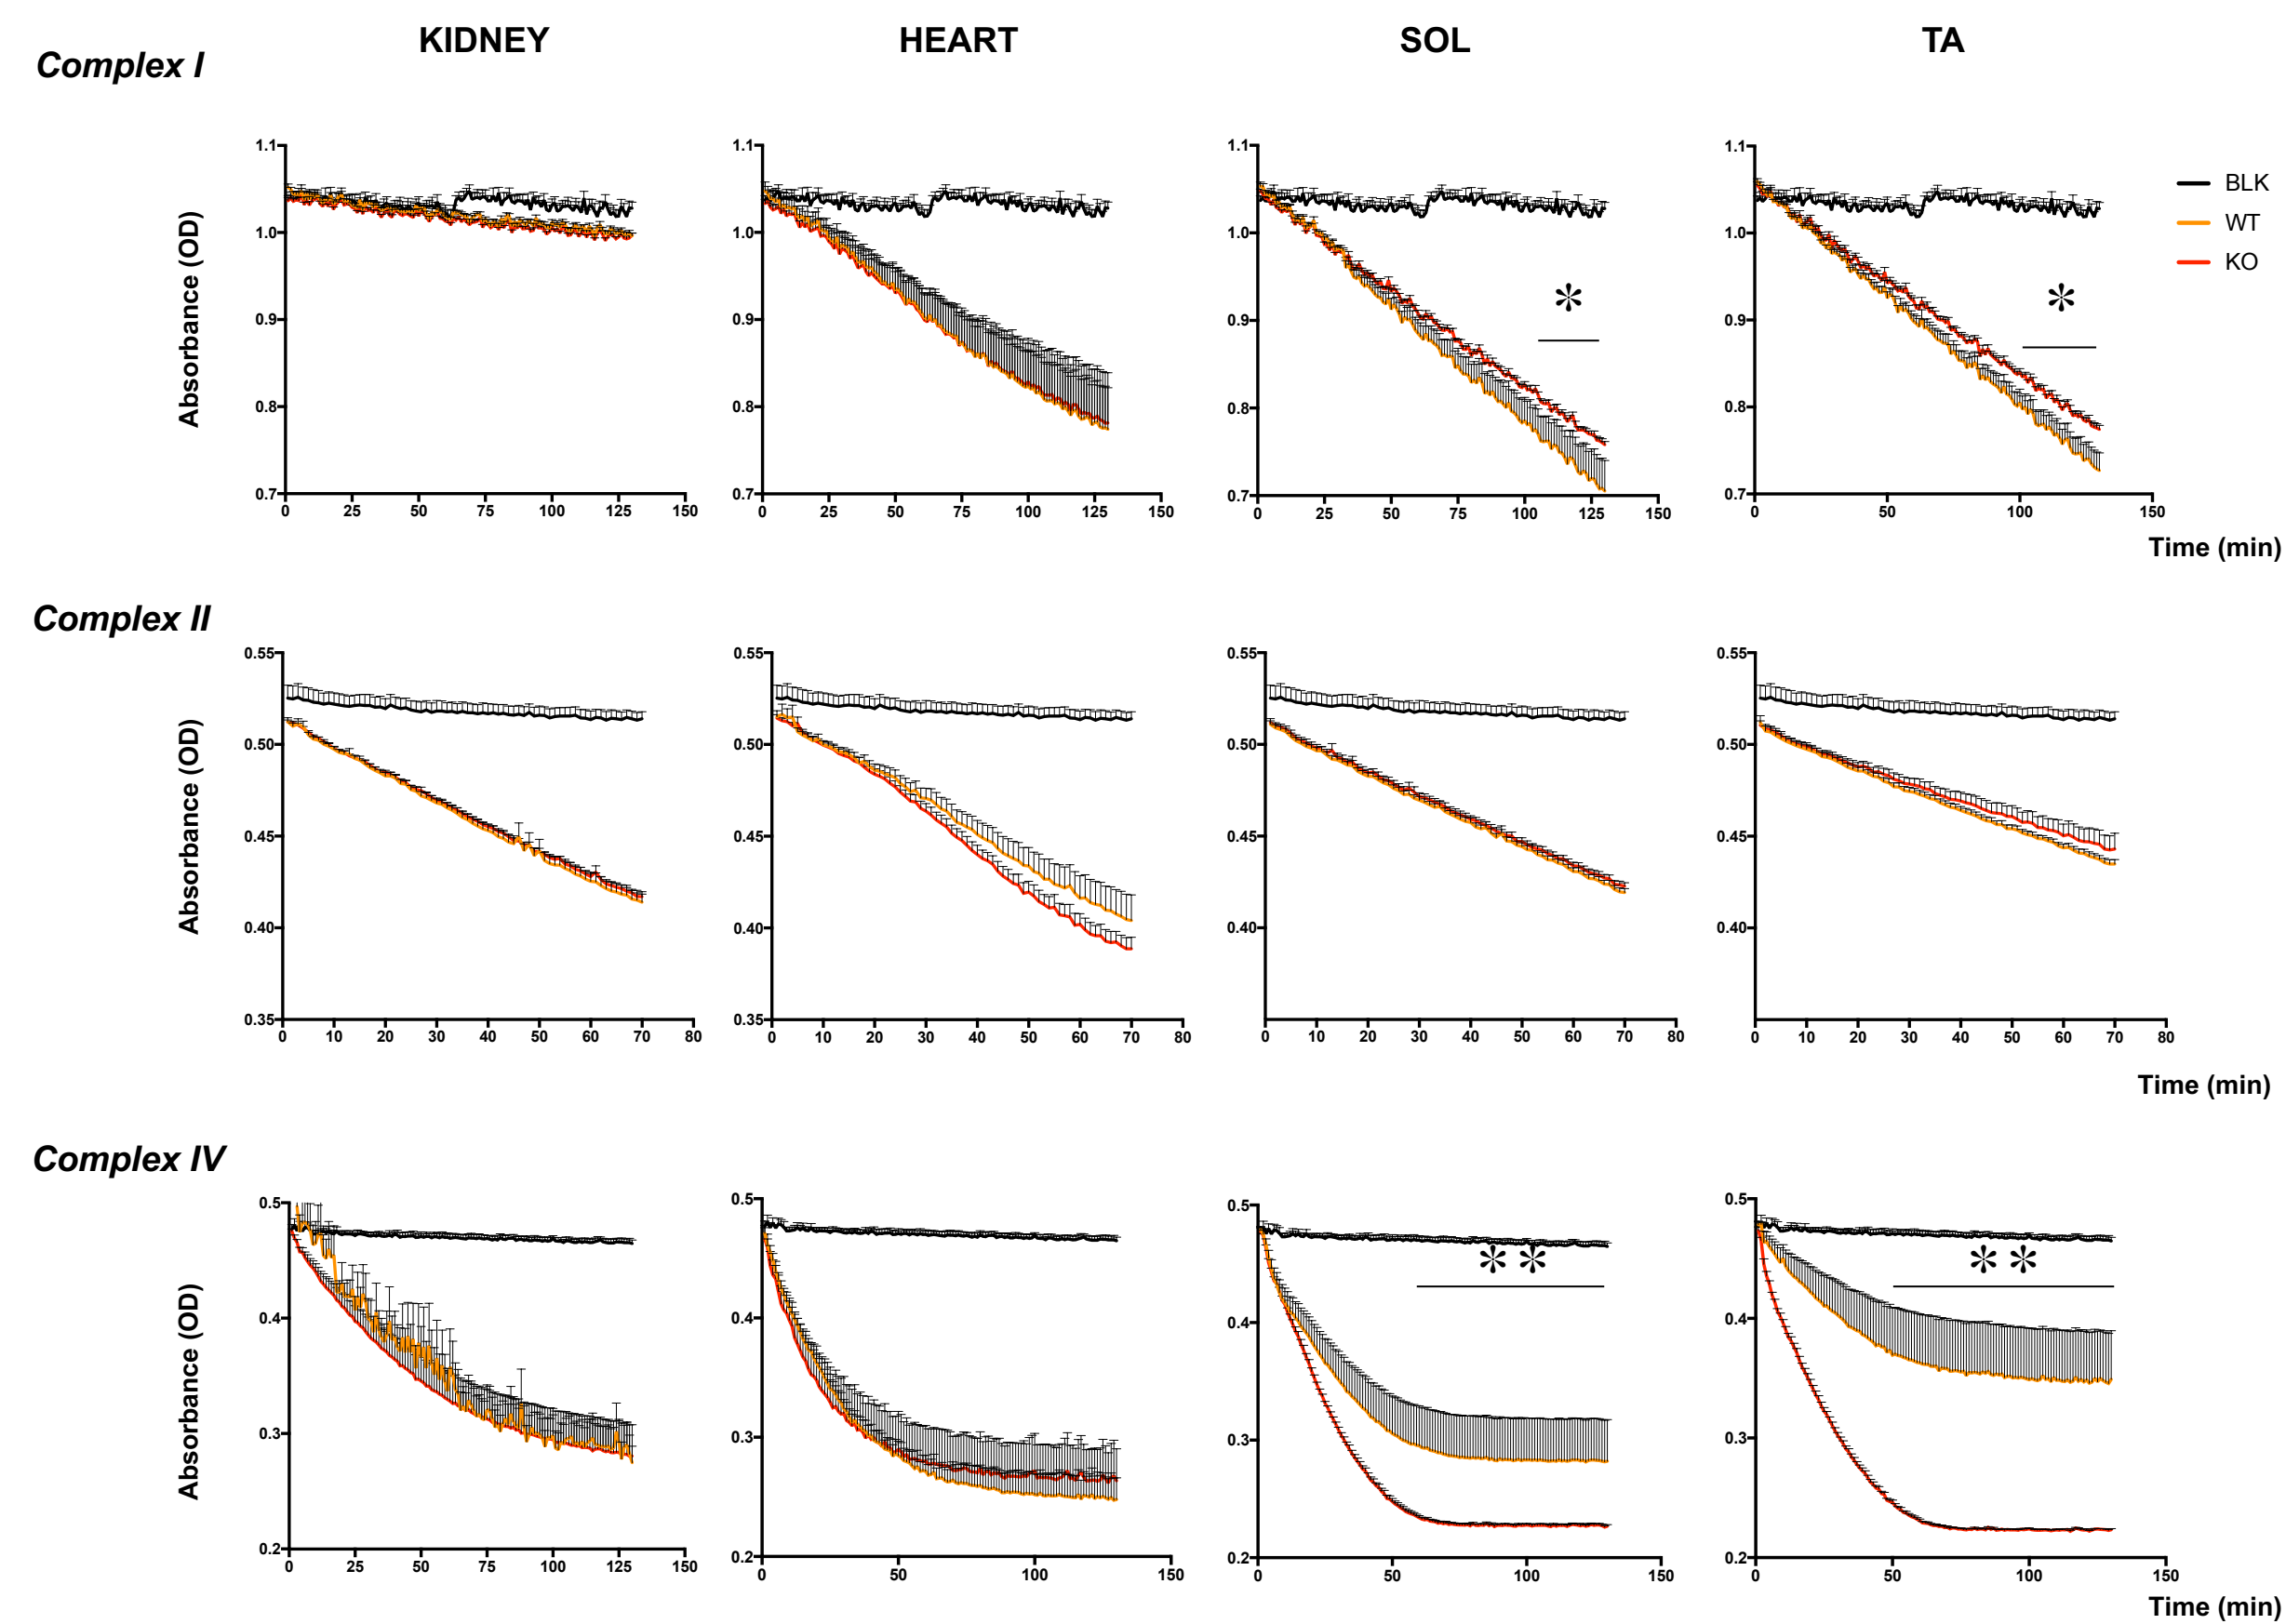

b

**Tibia Anteralis**

**Control mice: *HSACre***

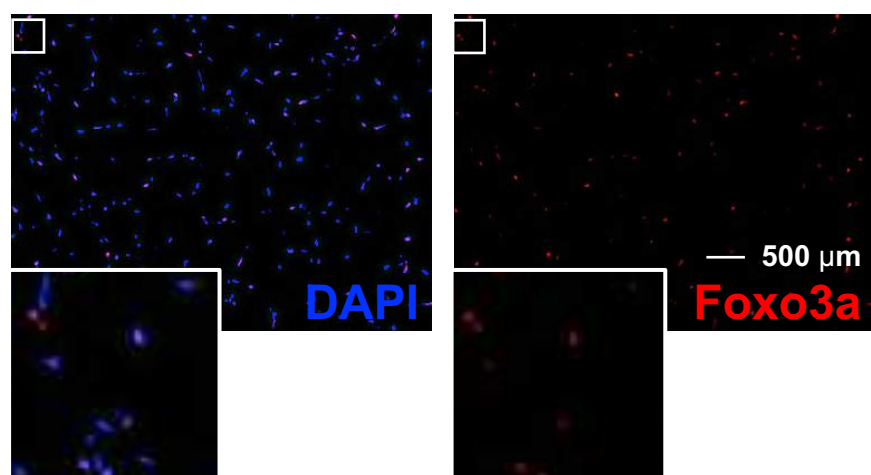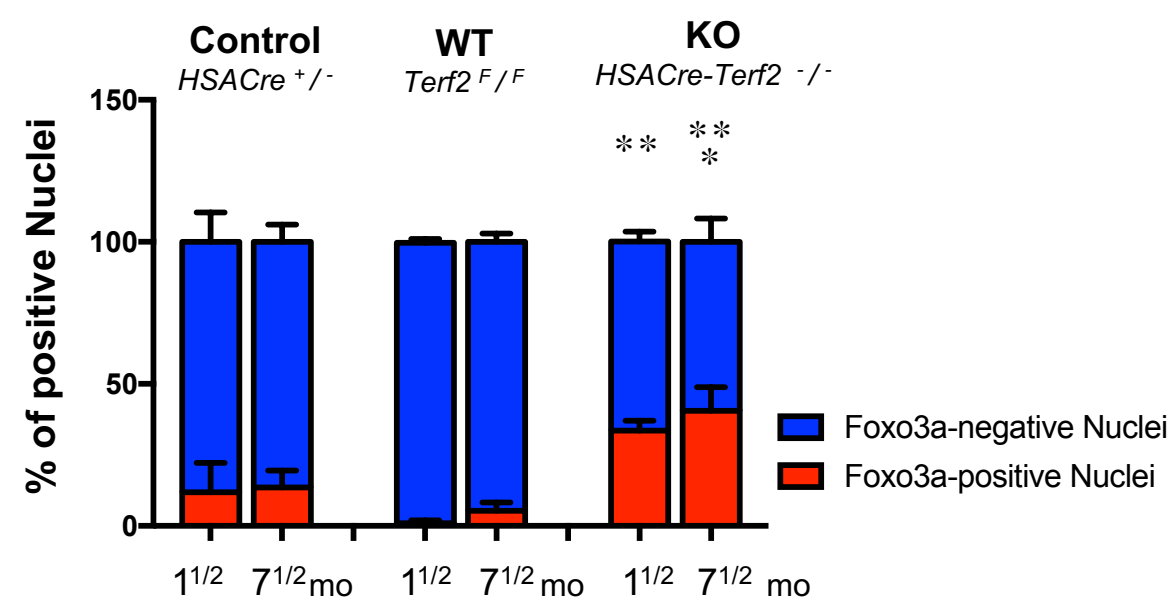

Supplement: ACEL-19-e13097-s001.pdf [file ACEL-19-e13097-s001.pdf]
